# Supplementary material for: Comparative Transcriptome Analysis Reveals the Mechanisms Underlying Differences in Salt Tolerance Between indica and japonica Rice at Seedling Stage
Source: Front Plant Sci. 2021 Oct 27;12:725436. doi: 10.3389/fpls.2021.725436 (PMC8578091; doi:10.3389/fpls.2021.725436)
Supplement: Supplementary Table 1 — Sequencing data and sample mapping rates. [file Table_1.XLSX]

## Sheet: Table S1
Table S1. Sequencing data and sample mapping rates
Samples	Total Reads	Clean bases	GC Content	%≥Q30	Mapped Reads
C2RCK0d-1	43795076	6548467148	0.532	0.927	34,121,394 (77.91%)
C2RCK0d-2	44727780	6679308342	0.5347	0.9252	35,743,768 (79.91%)
C2RCK0d-3	41240118	6165387934	0.5357	0.9289	32,968,623 (79.94%)
C2RSa3d-1	43169596	6452558246	0.5397	0.927	35,825,187 (82.99%)
C2RSa3d-2	45343796	6773586584	0.54	0.9333	37,470,167 (82.64%)
C2RSa3d-3	47333190	7066033456	0.5405	0.9308	38,852,296 (82.08%)
C2RSa7d-1	42115478	6286955496	0.5438	0.9349	32,386,257 (76.90%)
C2RSa7d-2	41147144	6151893692	0.5448	0.9352	30,044,706 (73.02%)
C2RSa7d-3	41840592	6249436218	0.5473	0.9349	31,886,064 (76.21%)
RPYCK0d-1	43731884	6517031582	0.53	0.934	36,823,696 (84.20%)
RPYCK0d-2	45026930	6737232684	0.5334	0.9347	36,708,810 (81.53%)
RPYCK0d-3	41393832	6190978234	0.5283	0.9323	34,710,218 (83.85%)
RPYSa3d-1	43863262	6546561240	0.5429	0.9335	38,368,089 (87.47%)
RPYSa3d-2	43248544	6454821548	0.5452	0.9329	33,656,041 (77.82%)
RPYSa3d-3	45402996	6777075882	0.5386	0.9328	39,580,335 (87.18%)
RPYSa7d-1	42505188	6346065124	0.54	0.9261	35,224,224 (82.87%)
RPYSa7d-2	41144862	6155200082	0.5421	0.9238	33,970,263 (82.56%)
RPYSa7d-3	42437624	6348289108	0.5411	0.9264	34,324,253 (80.88%)
Note: C2R stands for Chao 2R, RPY stands for RPY geng; CK0d stands for control treatment, Sa3d stands for salt stress treatment for 3 days, and Sa7d stands for salt stress treatment for 7 days; -1, -2, and -3 stand for biological repetition 1, 2, and 3, respectively.

## Sheet: Table S2
Table S2. Primers used in RT-PCR
Genes	F	R
EVM0022292	CAAGGGCGACAAGACCAA	TCGGCACAGGACCCAATC
EVM0010742	CAGCAAGGGCAGAAATGTC	AGCTCGCCGAGGTGGTAC
EVM0041760	GGTTTAGTAGATGCGATTAG	GAGGTAGTGCGTGATGAG
EVM0024798	GGACTACCTCGTCGCTCACC	TTGGACATTTCTGCGGCTCT
EVM0025666	GCACACTCCAAGCACACACAA	GAGGCTCACCGCTAGAACGA
(actin)UBI	ACCACTTCGACCGCCACTACT	ACGCCTAAGCCTGCTGGTT

## Sheet: Table S3
Table S3. DEGs with the opposite expressed profiles in two subspecies
	ID	RPYCK0d_vs_3d	RPYCK0d_vs_7d	C2RCK0d_vs_3d	C2RCK0d_vs_7d	COG_class	COG_class_annotation	GO_annotation	KEGG_annotation	KEGG_pathway_annotation	KOG_class	KOG_class_annotation	Pfam_annotation	Swiss-Prot_annotation	eggNOG_class	eggNOG_class_annotation	NR_annotation
Os01g0332200	EVM0023107	1.32449	2.35323	0.461391	-0.849407	[Q]	Secondary metabolites biosynthesis, transport and catabolism	Molecular Function: iron ion binding (GO:0005506);; Biological Process: response to light stimulus (GO:0009416);; Biological Process: gibberellin catabolic process (GO:0045487);; Molecular Function: C-19 gibberellin 2-beta-dioxygenase activity (GO:0052634);; Biological Process: oxidation-reduction process (GO:0055114);;	K04125|0|osa:9266994|K04125 gibberellin 2-oxidase [EC:1.14.11.13] | (RefSeq) B1140D12.2, OsGA2ox2; gibberellin 2-beta-dioxygenase 6	--	[QR]	Secondary metabolites biosynthesis, transport and catabolism;; General function prediction only	2OG-Fe(II) oxygenase superfamily;; non-haem dioxygenase in morphine synthesis N-terminal	Gibberellin 2-beta-dioxygenase 6 OS=Arabidopsis thaliana OX=3702 GN=GA2OX6 PE=2 SV=1	S	Function unknown	putative gibberellin 2-beta-dioxygenase 2 [Oryza sativa Japonica Group]
Os01g0248900	EVM0011100	1.02303	1.10728	-0.323544	-1.03925	--	--	Cellular Component: extracellular region (GO:0005576);; Cellular Component: cell wall (GO:0005618);; Biological Process: plant-type cell wall organization (GO:0009664);; Cellular Component: membrane (GO:0016020);;	--	--	--	--	Pollen allergen;; Lytic transglycolase	Expansin-A8 OS=Oryza sativa subsp. japonica OX=39947 GN=EXPA8 PE=2 SV=1	G	Carbohydrate transport and metabolism	PREDICTED: expansin-A8 [Oryza sativa Japonica Group]
Os08g0280100	EVM0037346	1.17562	1.04282	0.891322	-0.310018	[T]	Signal transduction mechanisms	Molecular Function: acid phosphatase activity (GO:0003993);; Cellular Component: integral component of membrane (GO:0016021);; Biological Process: dephosphorylation (GO:0016311);; Molecular Function: metal ion binding (GO:0046872);;	--	--	[G]	Carbohydrate transport and metabolism	Calcineurin-like phosphoesterase;; Purple acid Phosphatase, N-terminal domain;; Iron/zinc purple acid phosphatase-like protein C	Purple acid phosphatase 23 OS=Arabidopsis thaliana OX=3702 GN=PAP23 PE=1 SV=2	S	Function unknown	PREDICTED: purple acid phosphatase 23 isoform X1 [Oryza sativa Japonica Group]
Os04g0443300	EVM0027370	1.80724	1.20416	0.737089	-0.751462	[G]	Carbohydrate transport and metabolism	Cellular Component: extracellular region (GO:0005576);; Molecular Function: cellulase activity (GO:0008810);; Biological Process: cellulose catabolic process (GO:0030245);; Biological Process: cell wall organization (GO:0071555);;	K01179|0|osa:4335944|K01179 endoglucanase [EC:3.2.1.4] | (RefSeq) endoglucanase 11	Starch and sucrose metabolism (ko00500)	--	--	Glycosyl hydrolase family 9	Endoglucanase 11 OS=Oryza sativa subsp. japonica OX=39947 GN=GLU4 PE=2 SV=3	G	Carbohydrate transport and metabolism	PREDICTED: endoglucanase 11 [Oryza sativa Japonica Group]
Os01g0701500	EVM0016723	1.59	1.57307	0.550824	-0.947458	[QV]	Secondary metabolites biosynthesis, transport and catabolism;; Defense mechanisms	Molecular Function: monooxygenase activity (GO:0004497);; Molecular Function: iron ion binding (GO:0005506);; Cellular Component: mitochondrion (GO:0005739);; Cellular Component: integral component of membrane (GO:0016021);; Molecular Function: oxidoreductase activity, acting on paired donors, with incorporation or reduction of molecular oxygen (GO:0016705);; Molecular Function: heme binding (GO:…	K20771|0|osa:4326929|K20771 carlactone C-19 oxidase [EC:1.14.-.-] | (RefSeq) cytochrome P450 711A1	--	[Q]	Secondary metabolites biosynthesis, transport and catabolism	Cytochrome P450	Cytochrome P450 711A1 OS=Arabidopsis thaliana OX=3702 GN=CYP711A1 PE=2 SV=1	Q	Secondary metabolites biosynthesis, transport and catabolism	PREDICTED: cytochrome P450 711A1 [Oryza sativa Japonica Group]
Os08g0474100	EVM0003464	1.08678	1.68191	0.587367	-0.595109	--	--	--	--	--	--	--	--	--	S	Function unknown	hypothetical protein [Oryza sativa Japonica Group]
Os05g0458600	EVM0043183	1.33546	1.46175	-0.0907491	-1.0195	[P]	Inorganic ion transport and metabolism	Molecular Function: copper ion binding (GO:0005507);; Biological Process: lignin biosynthetic process (GO:0009809);; Molecular Function: oxidoreductase activity, oxidizing metal ions (GO:0016722);; Biological Process: lignin catabolic process (GO:0046274);; Cellular Component: apoplast (GO:0048046);; Molecular Function: hydroquinone:oxygen oxidoreductase activity (GO:0052716);; Biological Process…	--	--	[Q]	Secondary metabolites biosynthesis, transport and catabolism	Multicopper oxidase;; Multicopper oxidase;; Multicopper oxidase	Laccase-13 OS=Oryza sativa subsp. japonica OX=39947 GN=LAC13 PE=2 SV=1	Q	Secondary metabolites biosynthesis, transport and catabolism	PREDICTED: laccase-12/13 [Oryza sativa Japonica Group]
Os05g0356700	EVM0012006	1.34076	1.0431	0.25893	-1.03076	--	--	Cellular Component: Golgi apparatus (GO:0005794);; Cellular Component: integral component of membrane (GO:0016021);; Molecular Function: O-acetyltransferase activity (GO:0016413);; Biological Process: cell wall organization or biogenesis (GO:0071554);;	--	--	--	--	GDSL/SGNH-like Acyl-Esterase family found in Pmr5 and Cas1p;; PMR5 N terminal Domain	Protein trichome birefringence-like 33 OS=Arabidopsis thaliana OX=3702 GN=TBL33 PE=2 SV=1	S	Function unknown	PREDICTED: protein trichome birefringence-like 33 [Oryza sativa Japonica Group]
Os03g0245700	EVM0039235	0.933659	-0.815456	1.3055	1.21417	[Q]	Secondary metabolites biosynthesis, transport and catabolism	Biological Process: fatty acid biosynthetic process (GO:0006633);; Cellular Component: integral component of membrane (GO:0016021);; Molecular Function: transferase activity, transferring acyl groups other than amino-acyl groups (GO:0016747);;	K15397|0|osa:4332236|K15397 3-ketoacyl-CoA synthase [EC:2.3.1.199] | (RefSeq) 3-ketoacyl-CoA synthase 1	Fatty acid elongation (ko00062)	--	--	FAE1/Type III polyketide synthase-like protein;; 3-Oxoacyl-[acyl-carrier-protein (ACP)] synthase III C terminal;; Chalcone and stilbene synthases, C-terminal domain	3-ketoacyl-CoA synthase 1 OS=Arabidopsis thaliana OX=3702 GN=KCS1 PE=1 SV=1	I	Lipid transport and metabolism	PREDICTED: 3-ketoacyl-CoA synthase 1 [Oryza sativa Japonica Group]
Os01g0719300	EVM0045431	0.408257	-0.826522	2.71048	2.40425	[P]	Inorganic ion transport and metabolism	Cellular Component: integral component of plasma membrane (GO:0005887);; Molecular Function: secondary active sulfate transmembrane transporter activity (GO:0008271);; Biological Process: sulfate transmembrane transport (GO:1902358);;	K17471|0|osa:4324697|K17471 sulfate transporter 3 | (RefSeq) probable sulfate transporter 3.5	--	[P]	Inorganic ion transport and metabolism	Sulfate permease family;; STAS domain;; STAS domain	Probable sulfate transporter 3.5 OS=Arabidopsis thaliana OX=3702 GN=SULTR3;5 PE=2 SV=1	P	Inorganic ion transport and metabolism	PREDICTED: probable sulfate transporter 3.5 [Oryza sativa Japonica Group]
Os07g0154100	EVM0039644	-0.816001	0.906902	1.22742	1.9502	[Q]	Secondary metabolites biosynthesis, transport and catabolism	Cellular Component: chloroplast stroma (GO:0009570);; Biological Process: abscisic acid biosynthetic process (GO:0009688);; Molecular Function: 9-cis-epoxycarotenoid dioxygenase activity (GO:0045549);; Molecular Function: metal ion binding (GO:0046872);; Biological Process: oxidation-reduction process (GO:0055114);;	K09840|0|osa:4342424|K09840 9-cis-epoxycarotenoid dioxygenase [EC:1.13.11.51] | (RefSeq) 9-cis-epoxycarotenoid dioxygenase 1, chloroplastic	Carotenoid biosynthesis (ko00906)	[Q]	Secondary metabolites biosynthesis, transport and catabolism	Retinal pigment epithelial membrane protein	9-cis-epoxycarotenoid dioxygenase NCED4, chloroplastic OS=Oryza sativa subsp. japonica OX=39947 GN=NCED4 PE=2 SV=1	Q	Secondary metabolites biosynthesis, transport and catabolism	PREDICTED: LOW QUALITY PROTEIN: 9-cis-epoxycarotenoid dioxygenase 1, chloroplastic [Oryza sativa Japonica Group]
Os08g0476900	EVM0001261	0.554058	-0.798737	2.1278	2.39004	[R]	General function prediction only	Molecular Function: phospholipase activity (GO:0004620);; Cellular Component: plastid (GO:0009536);; Cellular Component: membrane (GO:0016020);; Biological Process: lipid catabolic process (GO:0016042);; Molecular Function: acylglycerol lipase activity (GO:0047372);;	--	--	[I]	Lipid transport and metabolism	Patatin-like phospholipase	Patatin-like protein 2 OS=Arabidopsis thaliana OX=3702 GN=PLP2 PE=1 SV=1	S	Function unknown	PREDICTED: patatin-like protein 2 [Oryza sativa Japonica Group]
Os03g0231150	EVM0022407	-0.148427	0.883964	1.09955	2.0541	--	--	Molecular Function: transcription factor activity, sequence-specific DNA binding (GO:0003700);; Cellular Component: nucleus (GO:0005634);; Biological Process: regulation of transcription, DNA-templated (GO:0006355);; Molecular Function: sequence-specific DNA binding (GO:0043565);;	K09338|7.76487e-81|osa:4332147|K09338 homeobox-leucine zipper protein | (RefSeq) Hox19, OJ1017C11.5, OJ1781E12.8, OsHox19; homeobox-leucine zipper protein HOX19	--	[K]	Transcription	Homeobox domain;; Homeobox associated leucine zipper	Homeobox-leucine zipper protein HOX19 OS=Oryza sativa subsp. japonica OX=39947 GN=HOX19 PE=2 SV=1	K	Transcription	PREDICTED: homeobox-leucine zipper protein HOX19 isoform X1 [Oryza sativa Japonica Group]
Os03g0197175	EVM0020278	0.752083	-0.389525	1.20002	1.75347	[G]	Carbohydrate transport and metabolism	Molecular Function: sugar:proton symporter activity (GO:0005351);; Molecular Function: glucose transmembrane transporter activity (GO:0005355);; Cellular Component: integral component of plasma membrane (GO:0005887);; Biological Process: proton transport (GO:0015992);; Biological Process: glucose import (GO:0046323);; Biological Process: glucose transmembrane transport (GO:1904659);;	--	--	[R]	General function prediction only	Sugar (and other) transporter;; Major Facilitator Superfamily	Polyol transporter 5 OS=Arabidopsis thaliana OX=3702 GN=PLT5 PE=1 SV=2	G	Carbohydrate transport and metabolism	PREDICTED: polyol transporter 5 [Oryza sativa Japonica Group]
Os01g0202800	EVM0016901	0.548535	-0.870788	2.47041	1.734	[G]	Carbohydrate transport and metabolism	Cellular Component: integral component of plasma membrane (GO:0005887);; Biological Process: water transport (GO:0006833);; Biological Process: cellular water homeostasis (GO:0009992);; Molecular Function: water channel activity (GO:0015250);; Molecular Function: glycerol channel activity (GO:0015254);; Biological Process: glycerol transport (GO:0015793);; Biological Process: ion transmembrane tr…	K09874|4.40573e-160|dosa:Os01t0202800-00|K09874 aquaporin NIP | (RAP-DB) Os01g0202800, NOD26_LIKE_INTRINSIC_PROTEIN_1;2, NIP1;2; Similar to NOD26-like membrane integral protein ZmNIP1-1.	--	[G]	Carbohydrate transport and metabolism	Major intrinsic protein	Aquaporin NIP1-2 OS=Oryza sativa subsp. japonica OX=39947 GN=NIP1-2 PE=2 SV=2	G	Carbohydrate transport and metabolism	hypothetical protein OsI_00806 [Oryza sativa Indica Group]
None	EVM0029005	-0.587586	0.745242	1.13408	2.47391	--	--	Biological Process: flavonoid biosynthetic process (GO:0009813);; Cellular Component: intracellular membrane-bounded organelle (GO:0043231);; Biological Process: flavonoid glucuronidation (GO:0052696);; Molecular Function: quercetin 3-O-glucosyltransferase activity (GO:0080043);; Molecular Function: quercetin 7-O-glucosyltransferase activity (GO:0080044);;	--	--	[GC]	Carbohydrate transport and metabolism;; Energy production and conversion	UDP-glucoronosyl and UDP-glucosyl transferase	Hydroquinone glucosyltransferase OS=Rauvolfia serpentina OX=4060 GN=AS PE=1 SV=1	S	Function unknown	Os02g0241700 [Oryza sativa Japonica Group]
Os05g0550600	EVM0043041	0.924594	0.947851	3.08877	3.78591	--	--	--	--	--	--	--	Probable lipid transfer	Non-specific lipid-transfer protein 2 OS=Oryza sativa subsp. indica OX=39946 GN=LTP-2 PE=3 SV=2	S	Function unknown	PREDICTED: non-specific lipid-transfer protein 2 [Oryza sativa Japonica Group]
Os10g0525000	EVM0042551	-1.17945	0.290199	1.48048	5.76406	[QV]	Secondary metabolites biosynthesis, transport and catabolism;; Defense mechanisms	Molecular Function: monooxygenase activity (GO:0004497);; Molecular Function: iron ion binding (GO:0005506);; Cellular Component: plastid (GO:0009536);; Cellular Component: integral component of membrane (GO:0016021);; Molecular Function: oxidoreductase activity, acting on paired donors, with incorporation or reduction of molecular oxygen (GO:0016705);; Molecular Function: heme binding (GO:002003…	--	--	[QI]	Secondary metabolites biosynthesis, transport and catabolism;; Lipid transport and metabolism	Cytochrome P450	Cytochrome P450 704C1 OS=Pinus taeda OX=3352 GN=CYP704C1 PE=2 SV=1	Q	Secondary metabolites biosynthesis, transport and catabolism	Cytochrome P450 family protein, expressed [Oryza sativa Japonica Group]
Os02g0102200	EVM0021088	0.411631	NA	1.38191	1.40814	--	--	Biological Process: amino acid transmembrane transport (GO:0003333);; Cellular Component: mitochondrion (GO:0005739);; Cellular Component: plasma membrane (GO:0005886);; Molecular Function: amino acid transmembrane transporter activity (GO:0015171);; Cellular Component: integral component of membrane (GO:0016021);;	--	--	[E]	Amino acid transport and metabolism	Transmembrane amino acid transporter protein	Amino acid permease 3 OS=Arabidopsis thaliana OX=3702 GN=AAP3 PE=1 SV=2	E	Amino acid transport and metabolism	PREDICTED: amino acid permease 3 isoform X1 [Oryza sativa Japonica Group]
Os04g0352400	EVM0037913	0.720719	-1.12734	1.25643	2.9716	[O]	Posttranslational modification, protein turnover, chaperones	Biological Process: protein peptidyl-prolyl isomerization (GO:0000413);; Molecular Function: peptidyl-prolyl cis-trans isomerase activity (GO:0003755);; Molecular Function: FK506 binding (GO:0005528);; Cellular Component: endoplasmic reticulum membrane (GO:0005789);; Biological Process: chaperone-mediated protein folding (GO:0061077);;	K09571|0|osa:4335556|K09571 FK506-binding protein 4/5 [EC:5.2.1.8] | (RefSeq) 70 kDa peptidyl-prolyl isomerase	--	[O]	Posttranslational modification, protein turnover, chaperones	FKBP-type peptidyl-prolyl cis-trans isomerase;; Tetratricopeptide repeat;; Tetratricopeptide repeat;; Tetratricopeptide repeat;; Tetratricopeptide repeat	Peptidyl-prolyl cis-trans isomerase FKBP62 OS=Arabidopsis thaliana OX=3702 GN=FKBP62 PE=1 SV=2	O	Posttranslational modification, protein turnover, chaperones	PREDICTED: 70 kDa peptidyl-prolyl isomerase [Oryza sativa Japonica Group]
Os07g0631200	EVM0002615	-0.143953	-1.27786	1.86629	1.14893	--	--	Biological Process: protein polyubiquitination (GO:0000209);; Molecular Function: zinc ion binding (GO:0008270);; Molecular Function: ligase activity (GO:0016874);; Biological Process: protein ubiquitination involved in ubiquitin-dependent protein catabolic process (GO:0042787);; Biological Process: proteasome-mediated ubiquitin-dependent protein catabolic process (GO:0043161);; Molecular Functio…	--	--	[O]	Posttranslational modification, protein turnover, chaperones	Ring finger domain;; Zinc finger, C3HC4 type (RING finger);; Zinc finger, C3HC4 type (RING finger);; RING-like zinc finger;; RING-type zinc-finger;; Zinc finger, C3HC4 type (RING finger);; Anaphase-promoting complex subunit 11 RING-H2 finger	E3 ubiquitin-protein ligase RING1-like OS=Arabidopsis thaliana OX=3702 GN=At3g19950 PE=1 SV=1	O	Posttranslational modification, protein turnover, chaperones	PREDICTED: E3 ubiquitin-protein ligase CIP8 [Oryza sativa Japonica Group]
Os05g0227600	Oryza_sativa_newGene_6995	-0.50004	-1.73583	1.29507	1.04431	--	--	--	--	--	--	--	Procyclic acidic repetitive protein (PARP);; Keratin-associated matrix	--	--	--	--
Os01g0253800	EVM0015097	0.974638	-1.08124	2.40868	1.99631	--	--	Molecular Function: DNA binding (GO:0003677);; Cellular Component: nucleus (GO:0005634);; Biological Process: DNA replication (GO:0006260);; Biological Process: DNA repair (GO:0006281);; Biological Process: DNA recombination (GO:0006310);;	--	--	--	--	--	--	S	Function unknown	hypothetical protein OsI_01213 [Oryza sativa Indica Group]
Os02g0756100	EVM0045304	0.0612499	-1.51245	1.36369	1.01745	--	--	Biological Process: guard cell differentiation (GO:0010052);;	--	--	--	--	Epidermal patterning factor proteins	EPIDERMAL PATTERNING FACTOR-like protein 1 OS=Arabidopsis thaliana OX=3702 GN=EPFL1 PE=1 SV=1	S	Function unknown	PREDICTED: EPIDERMAL PATTERNING FACTOR-like protein 1 [Oryza sativa Japonica Group]

## Sheet: Table S4
Table S4. Meta-QTLs collected in this study
Meta-QTLs	Chr	Marker Interval	Traits	Interval start	Interval end	Interval size
MQTL-1.1	1	RM6873-RM7241	SHL,STS,RTL,DLR	3324454	4803784	1479330
MQTL-1.2	1	RM3412-RM8115	CHL,KLV,NS,NKS,CHL,KS,RN	11584001	12684523	1100522
MQTL-1.3	1	RM5638-RM6880	RK,NKS,KS,SH,SIS,CHL,S	20935855	21995811	1059956
MQTL-1.4	1	RM8235-RM6504	S,SH,PL,SIS,SHL,	38439184	38986771	547587
MQTL-2.1	2	RM3495-RM3703	STS,KS,NS,GY,KS,SIS	2849327	3863915	1014588
MQTL-2.2	2	RM6611-RM4499	NS,S,STS,STS,KS,NKS,SIS,RTL,STS,CHL,NFS,NS	17846274	18535804	689530
MQTL-2.3	2	RM6023-RM3688	RK,CHL,S,DSW,SHL,SIS	20977476	22400887	1423411
MQTL-2.4	2	RM3730-RM6366	S,KS,NKS,SIS,NS,RTL	26242374	26971253	728879
MQTL-3.1	3	RM1332-RM3467	RTL,SIS	2454166	6004618	3550452
MQTL-3.2	3	RM7425-RM7249	KS,NKS,DW,STS,NSS,STS	11618798	12902252	1283454
MQTL-3.3	3	RM3844-RM3525	NS,STS,CHL,RTL,NS,NKS,STS	28212598	30394047	2181449
MQTL-3.4	3	RM3199-RM3867	CHL,NKS,CHL,NS,SH,RRW,PL	30422163	31753566	1331403
MQTL-4.1	4	RM2416-RM3471	NP,GY,NFS,DW,SN,SHL,RK,DLR	954021	6314764	5360743
MQTL-4.2	4	RM5633-RM5687	DLR,KS,DSW	13084092	15914409	2830317
MQTL-4.3	4	RM1223-RM317	SHL,KS,NKS,S	25477907	29246270	3768363
MQTL-4.4	4	RM6441-RM7410	DF,SH,CHL,STS,NS,NKS	33894240	34295297	401057
MQTL-5.1	5	RM5693-RM6209	SHL	463830	568202	104372
MQTL-5.2	5	RM3328-RM5994	RTL,DLR,STS,S,STS	5266949	6883664	1616715
MQTL-5.3	5	RM3695-RM3800	DLR,RTL,SIS,STS,S,STS	19653703	21454335	1800632
MQTL-5.4	5	RM6841-RM3486	DSR,SIS,KS,SH,NFS,QGW	22802523	25971038	3168515
MQTL-6.1	6	RM6263-RM2126	RTL,DSW	2041030	5906408	3865378
MQTL-6.2	6	RM564-RM5745	DSW,SHL,SIS,DW	11768248	12494214	725966
MQTL-6.3	6	RM3628-RM5957	CHL,RN,RDW,RFW,RTL,NS,DSW,RK,KS	23738029	24522597	784568
MQTL-6.4	6	RM6224-RM1150	NKS,NP,QGW,GY,RK,DSW,DF,NFS	29163762	30381408	1217646
MQTL-7.1	7	RM8022-RM6449	DSW,S,SIS,STS	8133395	15410970	7277575
MQTL-7.2	7	RM6427-RM5420	DW,DSW,SN,SIS,RSH,RDW,RFW,RLA,RRW,KS,NKS,RN,SH,RTW,STS	17450492	19358171	1907679
MQTL-7.3	7	RM7441-RM234	NS,RTL,DSW,SHL	24988890	25473814	484924
MQTL-7.4	7	RM3555-RM5720	KS,RTL,NS	27891580	28670229	778649
MQTL-8.1	8	RM3309-RM5068	DW,CHL,NS	1199960	3158019	1958059
MQTL-8.2	8	RM3214-RM210	DLR,CHL	8572123	22474744	13902621
MQTL-8.4	8	RM4487-RM3754	DSW,QGW,GY	26088104	26973079	884975
MQTL-9.1	9	RM6021-RM7390	KS,NS	5308628	10470727	5162099
MQTL-9.2	9	RM7048-RM1553	DSW,STS,NKS,RN,S,NP	16936206	21004085	4067879
MQTL-9.3	9	RM6251-RM3808	RN	19180541	20547983	1367442
MQTL-9.4	9	RM6643-RM1026	DSW,RTW	21707164	22605822	898658
MQTL-10.1	10	RM1125-RM6150	RTL,KS,S,DSW,STS,STS	17842706	18376117	533411
MQTL-10.2	10	RM3510-RM8202	CHL,RK	19150774	20304512	1153738
MQTL-10.3	10	RM5352-RM3123	QGW,DF,NFS,RTL	21192090	21836293	644203
MQTL-11.1	11	RM1240-RM6085	NS,S,STS	1463389	3045498	1582109
MQTL-11.2	11	RM6115-RM4862	DSW,KS,NKS,S,STS,DW	8086411	9986105	1899694
MQTL-11.3	11	RM4069A-RM6293	NS,SHL	26671791	28788249	2116458
MQTL-12.1	12	RM7003-RM1261	CHL,S,STS	6776193	17537337	10761144
MQTL-12.3	12	RM4589-RM1103	DSW,S,STS	22027824	23573250	1545426

## Sheet: Table S5
Table S5. stress-related genes collected in this study
Os01g0100900
Os01g0104100
Os01g0126600
Os01g0136200
Os01g0141000
Os01g0159800
Os01g0165000
Os01g0183400
Os01g0190500
Os01g0191300
Os01g0197700
Os01g0200600
Os01g0205700
Os01g0279900
Os01g0292700
Os01g0307500
Os01g0348900
Os01g0353400
Os01g0372500
Os01g0505600
Os01g0510100
Os01g0549700
Os01g0559550
Os01g0571300
Os01g0609300
Os01g0612600
Os01g0615100
Os01g0633500
Os01g0639900
Os01g0648000
Os01g0658900
Os01g0678500
Os01g0686800
Os01g0699100
Os01g0723400
Os01g0733200
Os01g0750100
Os01g0752500
Os01g0756700
Os01g0759400
Os01g0797600
Os01g0827300
Os01g0829800
Os01g0839100
Os01g0839200
Os01g0841500
Os01g0847200
Os01g0862800
Os01g0867300
Os01g0868000
Os01g0869200
Os01g0869900
Os01g0884300
Os01g0928000
Os01g0930400
Os01g0948400
Os01g0955100
Os01g0958000
Os01g0968800
Os01g0975300
Os02g0104700
Os02g0120800
Os02g0121300
Os02g0126400
Os02g0134300
Os02g0138900
Os02g0140300
Os02g0169300
Os02g0195600
Os02g0202000
Os02g0203700
Os02g0215900
Os02g0274900
Os02g0276500
Os02g0290600
Os02g0291400
Os02g0327000
Os02g0462800
Os02g0465900
Os02g0482400
Os02g0558100
Os02g0576700
Os02g0579600
Os02g0606700
Os02g0618400
Os02g0640500
Os02g0644000
Os02g0649300
Os02g0654700
Os02g0655200
Os02g0656600
Os02g0661100
Os02g0662000
Os02g0666200
Os02g0669100
Os02g0677300
Os02g0721600
Os02g0735200
Os02g0736400
Os02g0743500
Os02g0759800
Os02g0766700
Os02g0782700
Os02g0802500
Os02g0802700
Os02g0813500
Os02g0832800
Os03g0117100
Os03g0128700
Os03g0133000
Os03g0150200
Os03g0170900
Os03g0180800
Os03g0183300
Os03g0192700
Os03g0230500
Os03g0272300
Os03g0281900
Os03g0284800
Os03g0285800
Os03g0300400
Os03g0302000
Os03g0315400
Os03g0319300
Os03g0319400
Os03g0322900
Os03g0327600
Os03g0327800
Os03g0356414
Os03g0364400
Os03g0386000
Os03g0390200
Os03g0411100
Os03g0575200
Os03g0576200
Os03g0606200
Os03g0635100
Os03g0644400
Os03g0680800
Os03g0736500
Os03g0737000
Os03g0741100
Os03g0746500
Os03g0760800
Os03g0761100
Os03g0780400
Os03g0786400
Os03g0798200
Os03g0815100
Os03g0820300
Os03g0833200
Os03g0841800
Os04g0110100
Os04g0304400
Os04g0395600
Os04g0401700
Os04g0434800
Os04g0460600
Os04g0464200
Os04g0474800
Os04g0486800
Os04g0498600
Os04g0517100
Os04g0540900
Os04g0541700
Os04g0543900
Os04g0546800
Os04g0549700
Os04g0560600
Os04g0584750
Os04g0600200
Os04g0600300
Os04g0603200
Os04g0605500
Os04g0607500
Os04g0607600
Os04g0620700
Os04g0659100
Os04g0659300
Os04g0668900
Os04g0673300
Os04g0682800
Os05g0103200
Os05g0125000
Os05g0127200
Os05g0128200
Os05g0129000
Os05g0143500
Os05g0148600
Os05g0150500
Os05g0195200
Os05g0211100
Os05g0213500
Os05g0322900
Os05g0333200
Os05g0381400
Os05g0420300
Os05g0455500
Os05g0475400
Os05g0488800
Os05g0489700
Os05g0516600
Os05g0518600
Os05g0525900
Os05g0542500
Os05g0574500
Os05g0584200
Os05g0595100
Os05g0597100
Os06g0110200
Os06g0111500
Os06g0130100
Os06g0141200
Os06g0147800
Os06g0165600
Os06g0171900
Os06g0211200
Os06g0316000
Os06g0472000
Os06g0487900
Os06g0526600
Os06g0528600
Os06g0561000
Os06g0606000
Os06g0612800
Os06g0625900
Os06g0643900
Os06g0662200
Os06g0687200
Os06g0693700
Os06g0695600
Os06g0698785
Os06g0699400
Os06g0701700
Os06g0716700
Os07g0103500
Os07g0108500
Os07g0138400
Os07g0154100
Os07g0161600
Os07g0163000
Os07g0168800
Os07g0186000
Os07g0186200
Os07g0476500
Os07g0529800
Os07g0556800
Os07g0559700
Os07g0561300
Os07g0568300
Os07g0572100
Os07g0572800
Os07g0588700
Os07g0602700
Os07g0622000
Os07g0666900
Os07g0685700
Os07g0688800
Os07g0694000
Os07g0694700
Os08g0110500
Os08g0126300
Os08g0157000
Os08g0344100
Os08g0374701
Os08g0408200
Os08g0433500
Os08g0436700
Os08g0445700
Os08g0492100
Os08g0492500
Os08g0497600
Os08g0503800
Os08g0504700
Os08g0540300
Os08g0540400
Os08g0541400
Os08g0546800
Os08g0549100
Os09g0279600
Os09g0286400
Os09g0299200
Os09g0306400
Os09g0325700
Os09g0439200
Os09g0486500
Os09g0516600
Os09g0522000
Os09g0522200
Os09g0537700
Os09g0543400
Os09g0545300
Os09g0555500
Os09g0571200
Os10g0370500
Os10g0389000
Os10g0409400
Os10g0415300
Os10g0445400
Os10g0456800
Os10g0483000
Os10g0521000
Os10g0555100
Os11g0113700
Os11g0126900
Os11g0127600
Os11g0184900
Os11g0264300
Os11g0446000
Os11g0454300
Os11g0484500
Os11g0523700
Os11g0684000
Os11g0703900
Os11g0704500
Os12g0106200
Os12g0150200
Os12g0162100
Os12g0193000
Os12g0506800
Os12g0548300
Os12g0555000
Os12g0569700
Os12g0572000
Os12g0583700
Os12g0603800
Os12g0610300
Os12g0617000
Os12g0638700
Os12g0641100

## Sheet: Table S6
Table S6. DEGs in Meta-QTLs
New/Published	Meta-QTLs	DEGs ID	DEGs ID in IRGSP-1.0	Chr in RPY geng	Chr.start	Chr.end
New	MQTL-1.1	EVM0005149	Os01g0167900	1	39655444	39658761
New	MQTL-1.1	EVM0007475	Os01g0185500	1	38584527	38588336
New	MQTL-1.1	EVM0012428	Os01g0176800	1	39169384	39173393
New	MQTL-1.1	EVM0013184	Os01g0187900	1	38431246	38435302
New	MQTL-1.1	EVM0015631	Os01g0215000	1	36856799	36860536
New	MQTL-1.1	EVM0021927	Os01g0184100	1	38680948	38681448
New	MQTL-1.1	EVM0022815	Os01g0172100	1	39418953	39421443
New	MQTL-1.1	EVM0022829	Os01g0170051	1	39530643	39534147
New	MQTL-1.1	EVM0024880	Os01g0185400	1	38590523	38596732
New	MQTL-1.1	EVM0028248	Os01g0165100	1	39772045	39773999
New	MQTL-1.1	EVM0029411	Os01g0179600	1	38976542	38978284
New	MQTL-1.1	EVM0031675	Os01g0183600	1	38707517	38709471
New	MQTL-1.1	EVM0036086	Os01g0190300	1	38330934	38333193
New	MQTL-1.1	EVM0036253	Os01g0179800	1	38957877	38963806
New	MQTL-1.1	EVM0036268	Os01g0166700	1	39707071	39710371
New	MQTL-1.1	EVM0036741	Os01g0183850	1	38691972	38692472
New	MQTL-1.1	EVM0040368	Os01g0173600	1	39349611	39351989
New	MQTL-1.1	EVM0044442	Os01g0190000	1	38347810	38349790
New	MQTL-1.1	EVM0044951	Os01g0175100	1	39275518	39276539
New	MQTL-1.2	EVM0005538	Os01g0317500	1	30959217	30961162
New	MQTL-1.2	EVM0008076	Os01g0314100	1	31140460	31148128
New	MQTL-1.2	EVM0013533	Os01g0311800	1	31236212	31238722
New	MQTL-1.2	EVM0014253	Os01g0316100	1	31013468	31014864
New	MQTL-1.2	EVM0015910	Os01g0315700	1	31054056	31063069
New	MQTL-1.2	EVM0017047	Os01g0323775	1	30614246	30616792
New	MQTL-1.3	EVM0019077	Os01g0557500	1	22148355	22153992
New	MQTL-1.3	EVM0022332	Os01g0563000	1	21823007	21850557
New	MQTL-1.3	EVM0022982	Os01g0562600	1	21870831	21872366
New	MQTL-1.3	EVM0030475	Os01g0566100	1	21621016	21627221
New	MQTL-1.3	EVM0041105	Os01g0564300	1	21714543	21739114
New	MQTL-1.3	EVM0043223	Os01g0556650	1	22184250	22186484
New	MQTL-1.4	EVM0001555	Os01g0893400	1	4391385	4394220
New	MQTL-1.4	EVM0013837	Os01g0892800	1	4416930	4419898
New	MQTL-1.4	EVM0016543	Os01g0894700	1	4335041	4337535
New	MQTL-1.4	EVM0016597	Os01g0888300	1	4624898	4627681
New	MQTL-1.4	EVM0020801	Os01g0893700	1	4383495	4384866
New	MQTL-1.4	EVM0020822	Os01g0888900	1	4593204	4596468
New	MQTL-1.4	EVM0021622	Os01g0894300	1	4350067	4352884
New	MQTL-1.4	EVM0022333	Os01g0892600	1	4423686	4426515
New	MQTL-1.4	EVM0024164	Os01g0885700	1	4755022	4757642
New	MQTL-1.4	EVM0039476	Os01g0896500	1	4271553	4276434
New	MQTL-2.1	EVM0011301	Os02g0159700	2	3198443	3203122
New	MQTL-2.1	EVM0011646	Os02g0170701	2	3860075	3860467
New	MQTL-2.1	EVM0013689	Os02g0161100	2	3278998	3283011
New	MQTL-2.1	EVM0023963	Os02g0168100	2	3685090	3687480
New	MQTL-2.1	EVM0025695	Os02g0158900	2	3173593	3175629
New	MQTL-2.1	EVM0026612	Os02g0159800	2	3196958	3198406
New	MQTL-2.1	EVM0028513	Os02g0152900	2	2902562	2905329
New	MQTL-2.1	EVM0029199	Os02g0166800	2	3600829	3603188
New	MQTL-2.1	EVM0030790	Os02g0158500	2	3157300	3159804
New	MQTL-2.1	EVM0040924	Os02g0164000	2	3448946	3457410
New	MQTL-2.1	Oyza_sagiva_newGene_1964	Os02g0166501	2	3579193	3580117
New	MQTL-2.2	EVM0007515	Os02g0514500	2	18759128	18763143
New	MQTL-2.2	EVM0017075	Os02g0504200	2	17971662	17977152
New	MQTL-2.2	EVM0018862	Os02g0505500	2	18054719	18055543
New	MQTL-2.2	EVM0026920	Os02g0511400	2	18486173	18500107
New	MQTL-2.2	EVM0041865	Os02g0512000	2	18558754	18560210
New	MQTL-2.3	EVM0001643	Os02g0569000	2	21941020	21942525
New	MQTL-2.3	EVM0008492	Os02g0574600	2	22317597	22320788
New	MQTL-2.3	EVM0011764	Os02g0572400	2	22202669	22209192
New	MQTL-2.3	EVM0013459	Os02g0571100	2	22114261	22120812
New	MQTL-2.3	EVM0017559	Os02g0570400	2	22038220	22046586
New	MQTL-2.3	EVM0019174	Os02g0580500	2	22621362	22622430
New	MQTL-2.3	EVM0020401	Os02g0567100	2	21841683	21844886
New	MQTL-2.3	EVM0022213	Os02g0567800	2	21866056	21867267
New	MQTL-2.3	EVM0022496	Os02g0581100	2	22664680	22665388
New	MQTL-2.3	EVM0023503	Os02g0575900	2	22383971	22391620
New	MQTL-2.3	EVM0025147	Os02g0565300	2	21746305	21747136
New	MQTL-2.3	EVM0028161	Os02g0579800	2	22586073	22587921
New	MQTL-2.3	EVM0028514	Os02g0575700	2	22369922	22374795
New	MQTL-2.3	EVM0034288	Os02g0569400	2	21968791	21970497
New	MQTL-2.3	EVM0034382	Os02g0575000	2	22338789	22339480
New	MQTL-2.3	EVM0041760	Os02g0579000	2	22533058	22534864
New	MQTL-2.4	EVM0002771	Os02g0652000	2	26670752	26673094
New	MQTL-2.4	EVM0027602	Os02g0663800	2	27312426	27314915
New	MQTL-2.4	EVM0032622	Os02g0654600	2	26805250	26807709
New	MQTL-2.4	EVM0034803	Os02g0653900	2	26775191	26777174
New	MQTL-2.4	EVM0041793	Os02g0663900	2	27317233	27319689
New	MQTL-2.4	EVM0044427	Os02g0658200	2	27008741	27009683
New	MQTL-3.1	EVM0000410	Os03g0168000	3	3734250	3738199
New	MQTL-3.1	EVM0002616	Os03g0187350	3	4623567	4624305
New	MQTL-3.1	EVM0002798	Os03g0171300	3	3874513	3875485
New	MQTL-3.1	EVM0003621	Os03g0184550	3	4495724	4497420
New	MQTL-3.1	EVM0003784	Os03g0196000	3	5073429	5077940
New	MQTL-3.1	EVM0003977	Os03g0168100	3	3738436	3739938
New	MQTL-3.1	EVM0005191	Os03g0203200	3	5498413	5499854
New	MQTL-3.1	EVM0007402	Os03g0149000	3	2774892	2775880
New	MQTL-3.1	EVM0008119	Os03g0156300	3	3095099	3096583
New	MQTL-3.1	EVM0008225	Os03g0198600	3	5256617	5258216
New	MQTL-3.1	EVM0009511	Os03g0209800	3	5811088	5822285
New	MQTL-3.1	EVM0010212	Os03g0161800	3	3397254	3400575
New	MQTL-3.1	EVM0011057	Os03g0175200	3	4068180	4069966
New	MQTL-3.1	EVM0013052	Os03g0195800	3	5064004	5067718
New	MQTL-3.1	EVM0013703	Os03g0170701	3	3844410	3847066
New	MQTL-3.1	EVM0013757	Os03g0210700	3	5853867	5855521
New	MQTL-3.1	EVM0014379	Os03g0170500	3	3836739	3837886
New	MQTL-3.1	EVM0014599	Os03g0145102	3	2547757	2550946
New	MQTL-3.1	EVM0016685	Os03g0155500	3	3062072	3063184
New	MQTL-3.1	EVM0018233	Os03g0187800	3	4652957	4654449
New	MQTL-3.1	EVM0018843	Os03g0201901	3	5407330	5412113
New	MQTL-3.1	EVM0019096	Os03g0183200	3	4420586	4422183
New	MQTL-3.1	EVM0019595	Os03g0201500	3	5393442	5396868
New	MQTL-3.1	EVM0020278	Os03g0197175	3	5188115	5189941
New	MQTL-3.1	EVM0020653	Os03g0185700	3	4545973	4547868
New	MQTL-3.1	EVM0022034	Os03g0183500	3	4433273	4434387
New	MQTL-3.1	EVM0022338	Os03g0172100	3	3926566	3927204
New	MQTL-3.1	EVM0023226	Os03g0183600	3	4437696	4443067
New	MQTL-3.1	EVM0023355	Os03g0156000	3	3085231	3086202
New	MQTL-3.1	EVM0024006	Os03g0161900	3	3401359	3403384
New	MQTL-3.1	EVM0024180	Os03g0155700	3	3064939	3065946
New	MQTL-3.1	EVM0024214	Os03g0154000	3	3019982	3022632
New	MQTL-3.1	EVM0024605	Os03g0184100	3	4470361	4472792
New	MQTL-3.1	EVM0025081	Os03g0188200	3	4670749	4672029
New	MQTL-3.1	EVM0025213	Os03g0145900	3	2600397	2604627
New	MQTL-3.1	EVM0025246	Os03g0212800	3	5952404	5959453
New	MQTL-3.1	EVM0025313	Os03g0205800	3	5614560	5616337
New	MQTL-3.1	EVM0026463	Os03g0159600	3	3243300	3244696
New	MQTL-3.1	EVM0029325	Os03g0148000	3	2737518	2740236
New	MQTL-3.1	EVM0029326	Os03g0181100	3	4302401	4303379
New	MQTL-3.1	EVM0029778	Os03g0159900	3	3254362	3255370
New	MQTL-3.1	EVM0032701	Os03g0158300	3	3179213	3182388
New	MQTL-3.1	EVM0033439	Os03g0202001	3	5417273	5423300
New	MQTL-3.1	EVM0033847	Os03g0153900	3	3016684	3018713
New	MQTL-3.1	EVM0033944	Os03g0155300	3	3057291	3058712
New	MQTL-3.1	EVM0034683	Os03g0171900	3	3914391	3918493
New	MQTL-3.1	EVM0035526	Os03g0190300	3	4756090	4759536
New	MQTL-3.1	EVM0037142	Os03g0144300	3	2518414	2520225
New	MQTL-3.1	EVM0037421	Os03g0197100	3	5174257	5176668
New	MQTL-3.1	EVM0037518	Os03g0161500	3	3373591	3376467
New	MQTL-3.1	EVM0037528	Os03g0204900	3	5558199	5558743
New	MQTL-3.1	EVM0038492	Os03g0172850	3	3953588	3954004
New	MQTL-3.1	EVM0039051	Os03g0208500	3	5731158	5735235
New	MQTL-3.1	EVM0039379	Os03g0176900	3	4132984	4133490
New	MQTL-3.1	EVM0039470	Os03g0168200	3	3741064	3742711
New	MQTL-3.1	EVM0040123	Os03g0150800	3	2873796	2876167
New	MQTL-3.1	EVM0041879	Os03g0203700	3	5510418	5516405
New	MQTL-3.1	EVM0042698	Os03g0186900	3	4595166	4597015
New	MQTL-3.1	EVM0042738	Os03g0185000	3	4517871	4519078
New	MQTL-3.1	EVM0043355	Os03g0155900	3	3079876	3081067
New	MQTL-3.2	EVM0004297	Os03g0341000	3	12864654	12865710
New	MQTL-3.2	EVM0005641	Os03g0340500	3	12825783	12831958
New	MQTL-3.2	EVM0010088	Os03g0338000	3	12708596	12711438
New	MQTL-3.2	EVM0014294	Os03g0339900	3	12781865	12786296
New	MQTL-3.2	EVM0018000	Os03g0326200	3	12035389	12049748
New	MQTL-3.2	EVM0025471	Os03g0336000	3	12596675	12598929
New	MQTL-3.2	EVM0025615	Os03g0332100	3	12386858	12389496
New	MQTL-3.2	EVM0028815	Os03g0323200	3	11870425	11876730
New	MQTL-3.2	EVM0036761	Os03g0339400	3	12769211	12770626
New	MQTL-3.2	EVM0037424	Os03g0333400	3	12472597	12473538
New	MQTL-3.2	EVM0038308	Os03g0343900	3	12956418	12957118
New	MQTL-3.2	Oyza_sagiva_newGene_9813	Os03g0332201	3	12397811	12401714
New	MQTL-3.3	EVM0000011	Os03g0721300	3	29539451	29541684
New	MQTL-3.3	EVM0001044	Os03g0730000	3	30112619	30115965
New	MQTL-3.3	EVM0002779	Os03g0718100	3	29340659	29343085
New	MQTL-3.3	EVM0003541	Os03g0738600	3	30584207	30587711
New	MQTL-3.3	EVM0005130	Os03g0720800	3	29503300	29505467
New	MQTL-3.3	EVM0005227	Os03g0712800	3	29084390	29088146
New	MQTL-3.3	EVM0005250	Os03g0730400	3	30126420	30132547
New	MQTL-3.3	EVM0007054	Os03g0718500	3	29357551	29358546
New	MQTL-3.3	EVM0008536	Os03g0723600	3	29664974	29668735
New	MQTL-3.3	EVM0010151	Os03g0734200	3	30344516	30345452
New	MQTL-3.3	EVM0013983	Os03g0710600	3	28912651	28914674
New	MQTL-3.3	EVM0017492	Os03g0727600	3	29928182	29930426
New	MQTL-3.3	EVM0018448	Os03g0731100	3	30198872	30200253
New	MQTL-3.3	EVM0019097	Os03g0723800	3	29669271	29670474
New	MQTL-3.3	EVM0020883	Os03g0713600	3	29134549	29138658
New	MQTL-3.3	EVM0022424	Os03g0733900	3	30338815	30339477
New	MQTL-3.3	EVM0023036	Os03g0725200	3	29746515	29747284
New	MQTL-3.3	EVM0023039	Os03g0736600	3	30465890	30467545
New	MQTL-3.3	EVM0026043	Os03g0726200	3	29803370	29810270
New	MQTL-3.3	EVM0028782	Os03g0718800	3	29377543	29378322
New	MQTL-3.3	EVM0029125	Os03g0729100	3	30055735	30058776
New	MQTL-3.3	EVM0030113	Os03g0724600	3	29718554	29720984
New	MQTL-3.3	EVM0033896	Os03g0719850	3	29448002	29450241
New	MQTL-3.3	EVM0033980	Os03g0709300	3	28866013	28867903
New	MQTL-3.3	EVM0034460	Os03g0719400	3	29417283	29421137
New	MQTL-3.3	EVM0034503	Os03g0708500	3	28827297	28828236
New	MQTL-3.3	EVM0037365	Os03g0724700	3	29722310	29724883
New	MQTL-3.3	EVM0037934	Os03g0729800	3	30103788	30105786
New	MQTL-3.3	EVM0041081	Os03g0734000	3	30340032	30340867
New	MQTL-3.3	EVM0042725	Os03g0723400	3	29653628	29655277
New	MQTL-3.3	EVM0043101	Os03g0734300	3	30346691	30347407
New	MQTL-3.3	EVM0043651	Os03g0734100	3	30343440	30344216
New	MQTL-3.3	EVM0044075	Os03g0740200	3	30637604	30638498
New	MQTL-3.3	EVM0045468	Os03g0732000	3	30224329	30240720
New	MQTL-3.4	EVM0000825	Os03g0764000	3	31954104	31956666
New	MQTL-3.4	EVM0004577	Os03g0757600	3	31659284	31660879
New	MQTL-3.4	EVM0006257	Os03g0758000	3	31678340	31683452
New	MQTL-3.4	EVM0012570	Os03g0764100	3	31961877	31963138
New	MQTL-3.4	EVM0017098	Os03g0747700	3	31024755	31026616
New	MQTL-3.4	EVM0017970	Os03g0764600	3	32001028	32002532
New	MQTL-3.4	EVM0021304	Os03g0757200	3	31638440	31641217
New	MQTL-3.4	EVM0021629	Os03g0764900	3	32019279	32020897
New	MQTL-3.4	EVM0023710	Os03g0758300	3	31701134	31707342
New	MQTL-3.4	EVM0026724	Os03g0743900	3	30800683	30804324
New	MQTL-3.4	EVM0029419	Os03g0742900	3	30749821	30751939
New	MQTL-3.4	EVM0032857	Os03g0765400	3	32051622	32053843
New	MQTL-3.4	EVM0034551	Os03g0757900	3	31672362	31674798
New	MQTL-3.4	EVM0035261	Os03g0745000	3	30874085	30875296
New	MQTL-3.4	EVM0035616	Os03g0759600	3	31771026	31773704
New	MQTL-3.4	EVM0038546	Os03g0752500	3	31292393	31294315
New	MQTL-3.4	EVM0040405	Os03g0765400	3	32047589	32051580
New	MQTL-3.4	EVM0043129	Os03g0765900	3	32082089	32082964
New	MQTL-4.1	EVM0005122	Os04g0127800	4	32727507	32732556
New	MQTL-4.1	EVM0008109	Os04g0151700	4	31219556	31227806
New	MQTL-4.1	EVM0010855	Os04g0153000	4	31130055	31132151
New	MQTL-4.1	EVM0013150	Os04g0167900	4	30137608	30143601
New	MQTL-4.1	EVM0013321	Os04g0175450	4	29651571	29652963
New	MQTL-4.1	EVM0013783	Os04g0140666	4	31735022	31741374
New	MQTL-4.1	EVM0014328	Os04g0152400	4	31158851	31160095
New	MQTL-4.1	EVM0014731	Os04g0191500	4	28573530	28574037
New	MQTL-4.1	EVM0015328	Os04g0135400	4	32198395	32200322
New	MQTL-4.1	EVM0016094	Os04g0125700	4	32898043	32908599
New	MQTL-4.1	EVM0017043	Os04g0128700	4	32694124	32695656
New	MQTL-4.1	EVM0017073	Os04g0184100	4	29073304	29076979
New	MQTL-4.1	EVM0024748	Os04g0175400	4	29669225	29670259
New	MQTL-4.1	EVM0025996	Os04g0154800	4	30999223	31001437
New	MQTL-4.1	EVM0026484	Os04g0149400	4	31377088	31378755
New	MQTL-4.1	EVM0026732	Os04g0127200	4	32776895	32785091
New	MQTL-4.1	EVM0027350	Os04g0179100	4	29417767	29424835
New	MQTL-4.1	EVM0028151	Os04g0191400	4	28579372	28580807
New	MQTL-4.1	EVM0029530	Os04g0116900	4	33480419	33483194
New	MQTL-4.1	EVM0030262	Os04g0185600	4	28991991	28993637
New	MQTL-4.1	EVM0032789	Os04g0191800	4	28541655	28543212
New	MQTL-4.1	EVM0036929	Os04g0117900	4	33412099	33428305
New	MQTL-4.1	EVM0039588	Os04g0162800	4	30452587	30454871
New	MQTL-4.1	EVM0040709	Os04g0121800	4	33160452	33161311
New	MQTL-4.1	EVM0041525	Os04g0122000	4	33146330	33150990
New	MQTL-4.1	EVM0045435	Os04g0125700	4	32208175	32209050
New	MQTL-4.1	Oyza_sagiva_newGene_3542	Os04g0127750	4	24363249	24368944
New	MQTL-4.1	Oyza_sagiva_newGene_3725	Os04g0162701	4	30457597	30459740
New	MQTL-4.2	EVM0000586	Os04g0304200	4	21358354	21371641
New	MQTL-4.2	EVM0003756	Os04g0330900	4	19900270	19901266
New	MQTL-4.2	EVM0018951	Os04g0326100	4	20398142	20399632
New	MQTL-4.2	EVM0020491	Os04g0306400	4	21205539	21207171
New	MQTL-4.2	EVM0027623	Os04g0310200	4	20916912	20917859
New	MQTL-4.2	EVM0029580	Os04g0300600	4	21616698	21621475
New	MQTL-4.2	EVM0030398	Os04g0337500	4	19555191	19561080
New	MQTL-4.2	EVM0032804	Os04g0321800	4	20129579	20135176
New	MQTL-4.2	EVM0034894	Os04g0298700	4	21793718	21798510
New	MQTL-4.2	EVM0037546	Os04g0330200	4	19945000	19946925
New	MQTL-4.2	EVM0039995	Os04g0319800	4	20046544	20048034
New	MQTL-4.2	EVM0040692	Os04g0325300	4	20352461	20359419
New	MQTL-4.2	EVM0041146	Os04g0321700	4	20121692	20126662
New	MQTL-4.2	EVM0042620	Os04g0301500	4	21549202	21551570
New	MQTL-4.2	EVM0043090	Os04g0308400	4	21069222	21070203
New	MQTL-4.2	EVM0044005	Os04g0306800	4	21179233	21187918
New	MQTL-4.3	EVM0000345	Os04g0544000	4	8170963	8171650
New	MQTL-4.3	EVM0000854	Os04g0518800	4	9454456	9458622
New	MQTL-4.3	EVM0001684	Os04g0578000	4	6280230	6283203
New	MQTL-4.3	EVM0004429	Os04g0513700	4	9761112	9769462
New	MQTL-4.3	EVM0005685	Os04g0545700	4	8074876	8076497
New	MQTL-4.3	EVM0006628	Os04g0535600	4	8644560	8651250
New	MQTL-4.3	EVM0007353	Os04g0554200	4	7676700	7680188
New	MQTL-4.3	EVM0009172	Os04g0538100	4	8491882	8496040
New	MQTL-4.3	EVM0010775	Os04g0538900	4	8437303	8438360
New	MQTL-4.3	EVM0011115	Os04g0532400	4	8797666	8799387
New	MQTL-4.3	EVM0011153	Os04g0545400	4	8083330	8084040
New	MQTL-4.3	EVM0011447	Os04g0525100	4	9150269	9156926
New	MQTL-4.3	EVM0011719	Os04g0543000	4	8216273	8217985
New	MQTL-4.3	EVM0012061	Os04g0524500	4	9176911	9181077
New	MQTL-4.3	EVM0012211	Os04g0523100	4	9243804	9249014
New	MQTL-4.3	EVM0013645	Os04g0577375	4	6301131	6301830
New	MQTL-4.3	EVM0014563	Os04g0533500	4	8739765	8742075
New	MQTL-4.3	EVM0016155	Os04g0573000	4	6542864	6546765
New	MQTL-4.3	EVM0018919	Os04g0556500	4	7562316	7563944
New	MQTL-4.3	EVM0019815	Os04g0551700	4	7774799	7779516
New	MQTL-4.3	EVM0022714	Os04g0554500	4	7669069	7672663
New	MQTL-4.3	EVM0024503	Os04g0545100	4	8095639	8111971
New	MQTL-4.3	EVM0025127	Os04g0560700	4	7326865	7328751
New	MQTL-4.3	EVM0025898	Os04g0543600	4	8195096	8198450
New	MQTL-4.3	EVM0026228	Os04g0525000	4	9157853	9159280
New	MQTL-4.3	EVM0026240	Os04g0570000	4	6734625	6739083
New	MQTL-4.3	EVM0027138	Os04g0552000	4	7765232	7767133
New	MQTL-4.3	EVM0027818	Os04g0511200	4	9854145	9855960
New	MQTL-4.3	EVM0028430	Os04g0530900	4	8862027	8863709
New	MQTL-4.3	EVM0029464	Os04g0561500	4	7299103	7303847
New	MQTL-4.3	EVM0029633	Os04g0516600	4	9586960	9591191
New	MQTL-4.3	EVM0030073	Os04g0550600	4	7842438	7844874
New	MQTL-4.3	EVM0030290	Os04g0564700	4	7106434	7115511
New	MQTL-4.3	EVM0030359	Os04g0524600	4	9165338	9169832
New	MQTL-4.3	EVM0031236	Os04g0571600	4	6637247	6639411
New	MQTL-4.3	EVM0031704	Os04g0569300	4	6766677	6768474
New	MQTL-4.3	EVM0032050	Os04g0557000	4	7542453	7544757
New	MQTL-4.3	EVM0033788	Os04g0532800	4	8776011	8778557
New	MQTL-4.3	EVM0035161	Os04g0534600	4	8695114	8696451
New	MQTL-4.3	EVM0035732	Os04g0539000	4	8435649	8436465
New	MQTL-4.3	EVM0036413	Os04g0567200	4	6909350	6911836
New	MQTL-4.3	EVM0037515	Os04g0515900	4	9642903	9645879
New	MQTL-4.3	EVM0037797	Os04g0560100	4	7349061	7351369
New	MQTL-4.3	EVM0038686	Os04g0537100	4	8584848	8585351
New	MQTL-4.3	EVM0040111	Os04g0573900	4	6517000	6519187
New	MQTL-4.3	EVM0040538	Os04g0512300	4	9808315	9811154
New	MQTL-4.3	EVM0041662	Os04g0578400	4	6255765	6257817
New	MQTL-4.3	EVM0042176	Os04g0565900	4	7039704	7042546
New	MQTL-4.3	EVM0044693	Os04g0533900	4	8730561	8731855
New	MQTL-4.4	EVM0005699	Os04g0670500	4	1350628	1352892
New	MQTL-4.4	EVM0014896	Os04g0666800	4	1519575	1520576
New	MQTL-4.4	EVM0026113	Os04g0669800	4	1400207	1403487
New	MQTL-4.4	EVM0030498	Os04g0664950	4	1612423	1615149
New	MQTL-4.4	EVM0040156	Os04g0664800	4	1615771	1618134
New	MQTL-4.4	EVM0040626	Os04g0671300	4	1310692	1314747
New	MQTL-4.4	EVM0043850	Os04g0669900	4	1394550	1397182
New	MQTL-5.2	EVM0005368	Os05g0210100	5	6884607	6887515
New	MQTL-5.2	EVM0006143	Os05g0187100	5	5428860	5432901
New	MQTL-5.2	EVM0006583	Os05g0192100	5	5743792	5745620
New	MQTL-5.2	EVM0008357	Os05g0205400	5	6619551	6619850
New	MQTL-5.2	EVM0010742	Os05g0194500	5	5838657	5844135
New	MQTL-5.2	EVM0011680	Os05g0193700	5	5801775	5802296
New	MQTL-5.2	EVM0012197	Os05g0192700	5	5764306	5765099
New	MQTL-5.2	EVM0013015	Os05g0194900	5	5867708	5869905
New	MQTL-5.2	EVM0017390	Os05g0204600	5	6574513	6577054
New	MQTL-5.2	EVM0018806	Os05g0189900	5	5600046	5601933
New	MQTL-5.2	EVM0019851	Os05g0207400	5	6712914	6716547
New	MQTL-5.2	EVM0020351	Os05g0202500	5	6417343	6421396
New	MQTL-5.2	EVM0027900	Os05g0208550	5	6781407	6787396
New	MQTL-5.2	EVM0029097	Os05g0202800	5	6452874	6455091
New	MQTL-5.2	EVM0029802	Os05g0199100	5	6223105	6224474
New	MQTL-5.2	EVM0032861	Os05g0188100	5	5506462	5507641
New	MQTL-5.2	EVM0040562	Os05g0191700	5	5729408	5732004
New	MQTL-5.2	EVM0041852	Os05g0196400	5	5983537	5985983
New	MQTL-5.3	EVM0001962	Os05g0435300	5	20943223	20944159
New	MQTL-5.3	EVM0002212	Os05g0438600	5	21125437	21128652
New	MQTL-5.3	EVM0005623	Os05g0433500	5	20878857	20880616
New	MQTL-5.3	EVM0006566	Os05g0436900	5	21020416	21024336
New	MQTL-5.3	EVM0006884	Os05g0428700	5	20660093	20665590
New	MQTL-5.3	EVM0010989	Os05g0408800	5	19546078	19547298
New	MQTL-5.3	EVM0015868	Os05g0433400	5	20871978	20872817
New	MQTL-5.3	EVM0017756	Os05g0406550	5	19422006	19422293
New	MQTL-5.3	EVM0017841	Os05g0427200	5	20556541	20558327
New	MQTL-5.3	EVM0022292	Os05g0421600	5	20261666	20263971
New	MQTL-5.3	EVM0025749	Os05g0410500	5	19647195	19652624
New	MQTL-5.3	EVM0033667	Os05g0409500	5	19590122	19592078
New	MQTL-5.3	EVM0033769	Os05g0413200	5	19780035	19783364
New	MQTL-5.3	EVM0035345	Os05g0424700	5	20413095	20413967
New	MQTL-5.3	EVM0038155	Os05g0411100	5	19687792	19689810
New	MQTL-5.3	EVM0040527	Os05g0406100	5	19389460	19393711
New	MQTL-5.3	EVM0042783	Os05g0435800	5	20957281	20959955
New	MQTL-5.3	EVM0043081	Os05g0430700	5	20767022	20769533
New	MQTL-5.4	EVM0000183	Os05g0474800	5	22950262	22953119
New	MQTL-5.4	EVM0000742	Os05g0515200	5	25189476	25192966
New	MQTL-5.4	EVM0002260	Os05g0478300	5	23160629	23164127
New	MQTL-5.4	EVM0002680	Os05g0480000	5	23234874	23237445
New	MQTL-5.4	EVM0004438	Os05g0477600	5	23132262	23134210
New	MQTL-5.4	EVM0007357	Os05g0470000	5	22719563	22721909
New	MQTL-5.4	EVM0008654	Os05g0499400	5	24224965	24226856
New	MQTL-5.4	EVM0009006	Os05g0506000	5	24634219	24636487
New	MQTL-5.4	EVM0009672	Os05g0468800	5	22651702	22652532
New	MQTL-5.4	EVM0010337	Os05g0501300	5	24307669	24310817
New	MQTL-5.4	EVM0011866	Os05g0517200	5	25272789	25277595
New	MQTL-5.4	EVM0012556	Os05g0500900	5	24281364	24283705
New	MQTL-5.4	EVM0013099	Os05g0516800	5	25256322	25258419
New	MQTL-5.4	EVM0014235	Os05g0510600	5	24928086	24929783
New	MQTL-5.4	EVM0015557	Os05g0508900	5	24830325	24831598
New	MQTL-5.4	EVM0016439	Os05g0511050	5	24953741	24955174
New	MQTL-5.4	EVM0017312	Os05g0476350	5	23066095	23069740
New	MQTL-5.4	EVM0018803	Os05g0514800	5	25168125	25168749
New	MQTL-5.4	EVM0019168	Os05g0514400	5	25140182	25142225
New	MQTL-5.4	EVM0019605	Os05g0501400	5	24314390	24320412
New	MQTL-5.4	EVM0020109	Os05g0491200	5	23774573	23777895
New	MQTL-5.4	EVM0021914	Os05g0517100	5	25266998	25268157
New	MQTL-5.4	EVM0023927	Os05g0469800	5	22703799	22706128
New	MQTL-5.4	EVM0024114	Os05g0500000	5	24249542	24251205
New	MQTL-5.4	EVM0026637	Os05g0517900	5	25297229	25298629
New	MQTL-5.4	EVM0026719	Os05g0477900	5	23144649	23145665
New	MQTL-5.4	EVM0029167	Os05g0516400	5	25244340	25249448
New	MQTL-5.4	EVM0030222	Os05g0509500	5	24866554	24869923
New	MQTL-5.4	EVM0033660	Os05g0521900	5	25588294	25591486
New	MQTL-5.4	EVM0034424	Os05g0475300	5	22988584	22992452
New	MQTL-5.4	EVM0035241	Os05g0490900	5	23764074	23765422
New	MQTL-5.4	EVM0036309	Os05g0475700	5	23023444	23025547
New	MQTL-5.4	EVM0039245	Os05g0510800	5	24937587	24941542
New	MQTL-5.4	EVM0040033	Os05g0519300	5	25414699	25416854
New	MQTL-5.4	EVM0040364	Os05g0519700	5	25441874	25445428
New	MQTL-5.4	EVM0042071	Os05g0493800	5	23891540	23894016
New	MQTL-5.4	EVM0043989	Os05g0496200	5	24016326	24018562
New	MQTL-5.4	EVM0044586	Os05g0499300	5	24221045	24222771
New	MQTL-6.1	EVM0002436	Os06g0188400	6	25966607	25969565
New	MQTL-6.1	EVM0002512	Os06g0199000	6	25475855	25477935
New	MQTL-6.1	EVM0004372	Os06g0146800	6	27913431	27914059
New	MQTL-6.1	EVM0004641	Os06g0215500	6	24619548	24621182
New	MQTL-6.1	EVM0004693	Os06g0191900	6	25783601	25787393
New	MQTL-6.1	EVM0005079	Os06g0158000	6	27403373	27411495
New	MQTL-6.1	EVM0005364	Os06g0147300	6	27889880	27890604
New	MQTL-6.1	EVM0005777	Os06g0152800	6	27636512	27638937
New	MQTL-6.1	EVM0007115	Os06g0192100	6	25778964	25780548
New	MQTL-6.1	EVM0008361	Os06g0184900	6	26158090	26159427
New	MQTL-6.1	EVM0012484	Os06g0178900	6	26504915	26509779
New	MQTL-6.1	EVM0012500	Os06g0160700	6	27274642	27282304
New	MQTL-6.1	EVM0012595	Os06g0142300	6	28157039	28157927
New	MQTL-6.1	EVM0013507	Os06g0142200	6	28162950	28164262
New	MQTL-6.1	EVM0013952	Os06g0191800	6	25793015	25794716
New	MQTL-6.1	EVM0014144	Os06g0202300	6	25335449	25342440
New	MQTL-6.1	EVM0015032	Os06g0212600	6	24764032	24765678
New	MQTL-6.1	EVM0015466	Os06g0166400	6	27021032	27022251
New	MQTL-6.1	EVM0015807	Os06g0147000	6	27909014	27909753
New	MQTL-6.1	EVM0016298	Os06g0188700	6	25940724	25947267
New	MQTL-6.1	EVM0016381	Os06g0154200	6	27578310	27580472
New	MQTL-6.1	EVM0016425	Os06g0140400	6	28238925	28240278
New	MQTL-6.1	EVM0016966	Os06g0180100	6	26456291	26456854
New	MQTL-6.1	EVM0017288	Os06g0169900	6	26869072	26873768
New	MQTL-6.1	EVM0017345	Os06g0179000	6	26501296	26504565
New	MQTL-6.1	EVM0019894	Os06g0186100	6	26093724	26097312
New	MQTL-6.1	EVM0020518	Os06g0172800	6	26712456	26715909
New	MQTL-6.1	EVM0022625	Os06g0211600	6	24795288	24798602
New	MQTL-6.1	EVM0022842	Os06g0199700	6	25442722	25443388
New	MQTL-6.1	EVM0023579	Os06g0187500	6	26008188	26009907
New	MQTL-6.1	EVM0025960	Os06g0147100	6	27904882	27905936
New	MQTL-6.1	EVM0028319	Os06g0193200	6	25724864	25727494
New	MQTL-6.1	EVM0028364	Os06g0168500	6	26905004	26908269
New	MQTL-6.1	EVM0029836	Os06g0147250	6	27900653	27901998
New	MQTL-6.1	EVM0030166	Os06g0185500	6	26125460	26126977
New	MQTL-6.1	EVM0030200	Os06g0179100	6	26496148	26497407
New	MQTL-6.1	EVM0030715	Os06g0201000	6	25397162	25398414
New	MQTL-6.1	EVM0031112	Os06g0206900	6	25090412	25091731
New	MQTL-6.1	EVM0031581	Os06g0152700	6	27641607	27645202
New	MQTL-6.1	EVM0032010	Os06g0179500	6	26485640	26487811
New	MQTL-6.1	EVM0032337	Os06g0177600	6	26543156	26545139
New	MQTL-6.1	EVM0033928	Os06g0146600	6	27920702	27921476
New	MQTL-6.1	EVM0034904	Os06g0145600	6	27966216	27968567
New	MQTL-6.1	EVM0036846	Os06g0196300	6	25536646	25539006
New	MQTL-6.1	EVM0037403	Os06g0212300	6	24779553	24781518
New	MQTL-6.1	EVM0037587	Os06g0187300	6	26017204	26018538
New	MQTL-6.1	EVM0037884	Os06g0196200	6	25540902	25541615
New	MQTL-6.1	EVM0038411	Os06g0198500	6	25496025	25498470
New	MQTL-6.1	EVM0039045	Os06g0175400	6	26592514	26595853
New	MQTL-6.1	EVM0039270	Os06g0186300	6	26085545	26089505
New	MQTL-6.1	EVM0039651	Os06g0163300	6	27162705	27166082
New	MQTL-6.1	EVM0040197	Os06g0141100	6	28206984	28208623
New	MQTL-6.1	EVM0040609	Os06g0202100	6	25355206	25357365
New	MQTL-6.1	EVM0041176	Os06g0159600	6	27315105	27319190
New	MQTL-6.1	EVM0041643	Os06g0168700	6	26896358	26897537
New	MQTL-6.1	EVM0041855	Os06g0185300	6	26140723	26141905
New	MQTL-6.1	EVM0042139	Os06g0181700	6	26387739	26388382
New	MQTL-6.1	EVM0042895	Os06g0207700	6	25030381	25038997
New	MQTL-6.1	EVM0044251	Os06g0192400	6	25772485	25774900
New	MQTL-6.1	Oyza_sagiva_newGene_6637	Os06g0169001	6	26880639	26882455
New	MQTL-6.2	EVM0009732	Os06g0319366	6	18219615	18221181
New	MQTL-6.2	EVM0015431	Os06g0320500	6	18133950	18134969
New	MQTL-6.2	EVM0015882	Os06g0318600	6	18237209	18241833
New	MQTL-6.2	EVM0026139	Os06g0311000	6	18744813	18748515
New	MQTL-6.2	EVM0028753	Os06g0313440	6	18595493	18601947
New	MQTL-6.3	EVM0000275	Os06g0604200	6	7311377	7316037
New	MQTL-6.3	EVM0000387	Os06g0604000	6	7325615	7326578
New	MQTL-6.3	EVM0006643	Os06g0606700	6	7137267	7138648
New	MQTL-6.3	EVM0006783	Os06g0604300	6	7300458	7303266
New	MQTL-6.3	EVM0009507	Os06g0606401	6	7143409	7145767
New	MQTL-6.3	EVM0010303	Os06g0602500	6	7409569	7413270
New	MQTL-6.3	EVM0031456	Os06g0611900	6	6827048	6833547
New	MQTL-6.3	EVM0037994	Os06g0608700	6	6999441	7000998
New	MQTL-6.4	EVM0008103	Os06g0699600	6	1820610	1824491
New	MQTL-6.4	EVM0009407	Os06g0701900	6	1596674	1597550
New	MQTL-6.4	EVM0015601	Os06g0698802	6	1878734	1881940
New	MQTL-6.4	EVM0016098	Os06g0698748	6	1888521	1894341
New	MQTL-6.4	EVM0021859	Os06g0707000	6	1311884	1314118
New	MQTL-6.4	EVM0024097	Os06g0699100	6	1842677	1844199
New	MQTL-6.4	EVM0026056	Os06g0715200	6	822754	823731
New	MQTL-6.4	EVM0027709	Os06g0710300	6	1148576	1150402
New	MQTL-6.4	EVM0028393	Os06g0705000	6	1397705	1400157
New	MQTL-6.4	EVM0028963	Os06g0697600	6	1977327	1979168
New	MQTL-6.4	EVM0029766	Os06g0704700	6	1419568	1423913
New	MQTL-6.4	EVM0029852	Os06g0707733	6	1254580	1259705
New	MQTL-6.4	EVM0037502	Os06g0707200	6	1300181	1301684
New	MQTL-6.4	EVM0037866	Os06g0698300	6	1938413	1941387
New	MQTL-6.4	EVM0038367	Os06g0708700	6	1204313	1207575
New	MQTL-6.4	EVM0042090	Os06g0705100	6	1395663	1397315
New	MQTL-7.1	EVM0001137	Os07g0435300	7	15440918	15441604
New	MQTL-7.1	EVM0001392	Os07g0255900	7	20800814	20802491
New	MQTL-7.1	EVM0002201	Os07g0249900	7	21253705	21257408
New	MQTL-7.1	EVM0002242	Os07g0271000	7	19692365	19698159
New	MQTL-7.1	EVM0004448	Os07g0432201	7	15491476	15492298
New	MQTL-7.1	EVM0004573	Os07g0418600	7	16140537	16141638
New	MQTL-7.1	EVM0006429	Os07g0410700	7	16628891	16629671
New	MQTL-7.1	EVM0008763	Os07g0421866	7	15898868	15915920
New	MQTL-7.1	EVM0009926	Os07g0283050	7	18812483	18814609
New	MQTL-7.1	EVM0011147	Os07g0422100	7	15894725	15895782
New	MQTL-7.1	EVM0013506	Os07g0434700	7	15453991	15458541
New	MQTL-7.1	EVM0014430	Os07g0412100	7	16527961	16535821
New	MQTL-7.1	EVM0019145	Os07g0258400	7	20620770	20625080
New	MQTL-7.1	EVM0021929	Os07g0445800	7	14700010	14701539
New	MQTL-7.1	EVM0022044	Os07g0448100	7	14509898	14518722
New	MQTL-7.1	EVM0022729	Os07g0290200	7	18265542	18266289
New	MQTL-7.1	EVM0022867	Os07g0417200	7	16279304	16292368
New	MQTL-7.1	EVM0024771	Os07g0250900	7	21198776	21199816
New	MQTL-7.1	EVM0024827	Os07g0448600	7	14502326	14503714
New	MQTL-7.1	EVM0025118	Os07g0406300	7	16929614	16935445
New	MQTL-7.1	EVM0029273	Os07g0411300	7	16565988	16567333
New	MQTL-7.1	EVM0034270	Os07g0271500	7	19656860	19658478
New	MQTL-7.1	EVM0034771	Os07g0425000	7	15722468	15726046
New	MQTL-7.1	EVM0036805	Os07g0416900	7	16305659	16311464
New	MQTL-7.1	EVM0037169	Os07g0252400	7	21063503	21069281
New	MQTL-7.1	EVM0038171	Os07g0282300	7	18910757	18918385
New	MQTL-7.1	EVM0042452	Os07g0442900	7	14928121	14930126
New	MQTL-7.2	EVM0000377	Os07g0497500	7	11219667	11221334
New	MQTL-7.2	EVM0000838	Os07g0495150	7	11348264	11351553
New	MQTL-7.2	EVM0003069	Os07g0502900	7	10870297	10872196
New	MQTL-7.2	EVM0014252	Os07g0490100	7	10651903	10653652
New	MQTL-7.2	EVM0015076	Os07g0484200	7	11784444	11785214
New	MQTL-7.2	EVM0026467	Os07g0499500	7	11112933	11115964
New	MQTL-7.2	EVM0040340	Os07g0480900	7	11935187	11937012
New	MQTL-7.2	EVM0041370	Os07g0493800	7	11417413	11426418
New	MQTL-7.2	EVM0041386	Os07g0491900	Congig588_ERROPOS89975	53695	56005
New	MQTL-7.3	EVM0024471	Os07g0612400	7	4499999	4501937
New	MQTL-7.3	EVM0026146	Os07g0615200	7	4359812	4362562
New	MQTL-7.3	EVM0026632	Os07g0614700	7	4381293	4382465
New	MQTL-7.3	EVM0032215	Os07g0614000	7	4422352	4425117
New	MQTL-7.4	EVM0000395	Os07g0664600	7	1644055	1645854
New	MQTL-7.4	EVM0004702	Os07g0668500	7	1475377	1478631
New	MQTL-7.4	EVM0004971	Os07g0675100	7	1138496	1142070
New	MQTL-7.4	EVM0009249	Os07g0676900	7	1039453	1041108
New	MQTL-7.4	EVM0009922	Os07g0677100	7	1029888	1031897
New	MQTL-7.4	EVM0011875	Os07g0668300	7	1482342	1484647
New	MQTL-7.4	EVM0019377	Os07g0673400	7	1237546	1238912
New	MQTL-7.4	EVM0029740	Os07g0674500	7	1166190	1167057
New	MQTL-7.4	EVM0031607	Os07g0673200	7	1250631	1254506
New	MQTL-7.4	EVM0032662	Os07g0676600	7	1049722	1051631
New	MQTL-7.4	EVM0035644	Os07g0674150	7	1203247	1206819
New	MQTL-7.4	EVM0036608	Os07g0673600	7	1232081	1232434
New	MQTL-7.4	EVM0041858	Os07g0663600	7	1710195	1711561
New	MQTL-7.4	EVM0042948	Os07g0670300	7	1361788	1363101
New	MQTL-8.1	EVM0003379	Os08g0139100	8	2187109	2189216
New	MQTL-8.1	EVM0004915	Os08g0150700	8	2919425	2922133
New	MQTL-8.1	EVM0006395	Os08g0151300	8	2949257	2952102
New	MQTL-8.1	EVM0009889	Os08g0140500	8	2277512	2279580
New	MQTL-8.1	EVM0009914	Os08g0153900	8	3099498	3100328
New	MQTL-8.1	EVM0016035	Os08g0137400	8	2124764	2126185
New	MQTL-8.1	EVM0017476	Os08g0138900	8	2179393	2180209
New	MQTL-8.1	EVM0018790	Os08g0137800	8	2138739	2139570
New	MQTL-8.1	EVM0026628	Os08g0152366	8	3009861	3011887
New	MQTL-8.1	EVM0028898	Os08g0124100	8	1321990	1323527
New	MQTL-8.1	EVM0032671	Os08g0148267	8	2754358	2758922
New	MQTL-8.1	EVM0039898	Os08g0137900	8	2142751	2143445
New	MQTL-8.1	EVM0040798	Os08g0130100	8	1694524	1697107
New	MQTL-8.1	EVM0043507	Os08g0124700	8	1379791	1381898
New	MQTL-8.1	EVM0043997	Os08g0126700	8	1544834	1548514
New	MQTL-8.2	EVM0000724	Os08g0441100	8	20915641	20917544
New	MQTL-8.2	EVM0000888	Os08g0373000	8	16867791	16871998
New	MQTL-8.2	EVM0002394	Os08g0374000	8	16926411	16928009
New	MQTL-8.2	EVM0002862	Os08g0327700	8	13942784	13943312
New	MQTL-8.2	EVM0003123	Os08g0387700	8	17737078	17746326
New	MQTL-8.2	EVM0003400	Os08g0323400	8	13662658	13664042
New	MQTL-8.2	EVM0003965	Os08g0359000	8	15995915	16000088
New	MQTL-8.2	EVM0004068	Os08g0347000	8	15150104	15151586
New	MQTL-8.2	EVM0004165	Os08g0401800	8	18590442	18597892
New	MQTL-8.2	EVM0004333	Os08g0398350	8	18417677	18424871
New	MQTL-8.2	EVM0004741	Os08g0331800	8	14125443	14126037
New	MQTL-8.2	EVM0004794	Os08g0391000	8	17925305	17926837
New	MQTL-8.2	EVM0005104	Os08g0248700	8	8558543	8560111
New	MQTL-8.2	EVM0005770	Os08g0276100	8	10378992	10382025
New	MQTL-8.2	EVM0005954	Os08g0382400	8	17436556	17440410
New	MQTL-8.2	EVM0006510	Os08g0298700	8	11821863	11827358
New	MQTL-8.2	EVM0006741	Os08g0428200	8	20037756	20039191
New	MQTL-8.2	EVM0007047	Os08g0335600	8	14423645	14424635
New	MQTL-8.2	EVM0008958	Os08g0438400	8	20756410	20757880
New	MQTL-8.2	EVM0009379	Os08g0442350	8	21005412	21006991
New	MQTL-8.2	EVM0009491	Os08g0299400	8	11960820	11964089
New	MQTL-8.2	EVM0009785	Os08g0327100	8	13903282	13907990
New	MQTL-8.2	EVM0010097	Os08g0288400	8	11171845	11173879
New	MQTL-8.2	EVM0010594	Os08g0246300	8	8434686	8447900
New	MQTL-8.2	EVM0010947	Os08g0377500	8	17146982	17148177
New	MQTL-8.2	EVM0012797	Os08g0431700	8	20328640	20334233
New	MQTL-8.2	EVM0013761	Os08g0373400	8	16886544	16895212
New	MQTL-8.2	EVM0015112	Os08g0435900	8	20619577	20620956
New	MQTL-8.2	EVM0015144	Os08g0321000	8	13489841	13493149
New	MQTL-8.2	EVM0015915	Os08g0403300	8	18661403	18662764
New	MQTL-8.2	EVM0016772	Os08g0331000	8	14102887	14103516
New	MQTL-8.2	EVM0016943	Os08g0444440	8	21092516	21095412
New	MQTL-8.2	EVM0017167	Os08g0414700	8	19262729	19268441
New	MQTL-8.2	EVM0019522	Os08g0254600	8	9285525	9288783
New	MQTL-8.2	EVM0021042	Os08g0425300	8	19862072	19863661
New	MQTL-8.2	EVM0021340	Os08g0379400	8	17272425	17273895
New	MQTL-8.2	EVM0023435	Os08g0428100	8	20028853	20033779
New	MQTL-8.2	EVM0024002	Os08g0343000	8	14883085	14889535
New	MQTL-8.2	EVM0024208	Os08g0356800	8	15820788	15822692
New	MQTL-8.2	EVM0025036	Os08g0455600	8	21783614	21785293
New	MQTL-8.2	EVM0026904	Os08g0451200	8	21483213	21484577
New	MQTL-8.2	EVM0027004	Os08g0402500	8	18623695	18624592
New	MQTL-8.2	EVM0027065	Os08g0431900	8	20345197	20354650
New	MQTL-8.2	EVM0028168	Os08g0450100	8	21427207	21430582
New	MQTL-8.2	EVM0028721	Os08g0412800	8	19179872	19181029
New	MQTL-8.2	EVM0029440	Os08g0360300	8	16076516	16079819
New	MQTL-8.2	EVM0029843	Os08g0402700	8	18637446	18641588
New	MQTL-8.2	EVM0030756	Os08g0300300	8	12052572	12058885
New	MQTL-8.2	EVM0033107	Os08g0353700	8	15556513	15563000
New	MQTL-8.2	EVM0033347	Os08g0404900	8	18757491	18758413
New	MQTL-8.2	EVM0034529	Os08g0357000	8	15829320	15834152
New	MQTL-8.2	EVM0034611	Os08g0352100	8	15471078	15472241
New	MQTL-8.2	EVM0035058	Os08g0458200	8	21911673	21914293
New	MQTL-8.2	EVM0035544	Os08g0253800	8	9256434	9260405
New	MQTL-8.2	EVM0035654	Os08g0297800	8	11773093	11774374
New	MQTL-8.2	EVM0037346	Os08g0280100	8	10649136	10653540
New	MQTL-8.2	EVM0038147	Os08g0407600	8	18907388	18908781
New	MQTL-8.2	EVM0038357	Os08g0412700	8	19177738	19179265
New	MQTL-8.2	EVM0038484	Os08g0290700	8	11318886	11320361
New	MQTL-8.2	EVM0038529	Os08g0376500	8	17079995	17083046
New	MQTL-8.2	EVM0038740	Os08g0327400	8	13919714	13924294
New	MQTL-8.2	EVM0039142	Os08g0405700	8	18799814	18803944
New	MQTL-8.2	EVM0039674	Os08g0356700	8	15808928	15811148
New	MQTL-8.2	EVM0040171	Os08g0413000	8	19189373	19193099
New	MQTL-8.2	EVM0040301	Os08g0452500	8	21585908	21586822
New	MQTL-8.2	EVM0041468	Os08g0345500	8	15048891	15052259
New	MQTL-8.2	EVM0042583	Os08g0357300	8	15861052	15863310
New	MQTL-8.2	EVM0044655	Os08g0434566	8	20525812	20534718
New	MQTL-8.2	EVM0045511	Os08g0374400	8	16954751	16957690
New	MQTL-8.4	EVM0002183	Os08g0527900	8	25653530	25654309
New	MQTL-8.4	EVM0002411	Os08g0532700	8	25996579	25999484
New	MQTL-8.4	EVM0006333	Os08g0538100	8	26341243	26342889
New	MQTL-8.4	EVM0006458	Os08g0531600	8	25950426	25955258
New	MQTL-8.4	EVM0009623	Os08g0527600	8	25715622	25717358
New	MQTL-8.4	EVM0011755	Os08g0529300	8	25800437	25801874
New	MQTL-8.4	EVM0021907	Os08g0531000	8	25888688	25894795
New	MQTL-8.4	EVM0022411	Os08g0535000	8	26416047	26418548
New	MQTL-8.4	EVM0031025	Os08g0531100	8	25897523	25902298
New	MQTL-8.4	EVM0033588	Os08g0533600	8	26050509	26054894
New	MQTL-8.4	EVM0035066	Os08g0526150	8	25614354	25616579
New	MQTL-8.4	EVM0037163	Os08g0534950	8	26111412	26112208
New	MQTL-8.4	EVM0037998	Os08g0529100	8	25791719	25793747
New	MQTL-8.4	EVM0038972	Os08g0529000	8	25781629	25784904
New	MQTL-8.4	EVM0043468	Os08g0534950	8	26413780	26414211
New	MQTL-9.1	EVM0000890	Os09g0334900	9	12764783	12767140
New	MQTL-9.1	EVM0000892	Os09g0327000	9	13283749	13284872
New	MQTL-9.1	EVM0003631	Os09g0323700	9	13433835	13435858
New	MQTL-9.1	EVM0003721	Os09g0272600	9	17114380	17115239
New	MQTL-9.1	EVM0005495	Os09g0304400	9	14806621	14809411
New	MQTL-9.1	EVM0008439	Os09g0337300	9	12671096	12673588
New	MQTL-9.1	EVM0012343	Os09g0278700	9	16761672	16762787
New	MQTL-9.1	EVM0013795	Os09g0307300	9	14573998	14577847
New	MQTL-9.1	EVM0016168	Os09g0330000	9	13093852	13094270
New	MQTL-9.1	EVM0020770	Os09g0298200	9	15332625	15337202
New	MQTL-9.1	EVM0022145	Os09g0325800	9	13354728	13355896
New	MQTL-9.1	EVM0022623	Os09g0316000	9	14175319	14178138
New	MQTL-9.1	EVM0025018	Os09g0274900	9	16976230	16977415
New	MQTL-9.1	EVM0026126	Os09g0323000	9	13483576	13488699
New	MQTL-9.1	EVM0030006	Os09g0324400	9	13419389	13420678
New	MQTL-9.1	EVM0030525	Os09g0272900	9	17077988	17097490
New	MQTL-9.1	EVM0031226	Os09g0323500	9	13447539	13449978
New	MQTL-9.1	EVM0031391	Os09g0332700	9	12946697	12955483
New	MQTL-9.1	EVM0032862	Os09g0287000	9	16203331	16204972
New	MQTL-9.1	EVM0038052	Os09g0279400	9	16718320	16722450
New	MQTL-9.1	EVM0039362	Os09g0323700	9	13439253	13440322
New	MQTL-9.1	EVM0043733	Os09g0315700	9	14204730	14209811
New	MQTL-9.1	EVM0030559	Os09g0309200	Congig164	28915	33102
New	MQTL-9.2	EVM0001928	Os09g0508900	9	3299367	3303685
New	MQTL-9.2	EVM0003139	Os09g0482640	9	4504019	4507512
New	MQTL-9.2	EVM0003750	Os09g0517200	9	2864383	2869495
New	MQTL-9.2	EVM0004687	Os09g0524800	9	2504884	2507542
New	MQTL-9.2	EVM0005026	Os09g0463600	9	5496474	5497517
New	MQTL-9.2	EVM0007393	Os09g0479900	9	4624206	4628252
New	MQTL-9.2	EVM0007564	Os09g0471100	9	5111890	5114974
New	MQTL-9.2	EVM0009159	Os09g0481800	9	4535971	4538374
New	MQTL-9.2	EVM0009282	Os09g0467400	9	5276553	5279783
New	MQTL-9.2	EVM0009285	Os09g0490400	9	4158557	4162346
New	MQTL-9.2	EVM0009453	Os09g0520800	9	2671761	2673706
New	MQTL-9.2	EVM0010849	Os09g0468700	9	5219328	5221334
New	MQTL-9.2	EVM0010943	Os09g0483200	9	4386814	4388958
New	MQTL-9.2	EVM0011177	Os09g0505000	9	3512402	3513348
New	MQTL-9.2	EVM0011754	Os09g0452800	9	6081031	6082658
New	MQTL-9.2	EVM0011815	Os09g0482500	9	4522705	4525146
New	MQTL-9.2	EVM0011934	Os09g0460500	9	5625245	5626603
New	MQTL-9.2	EVM0013281	Os09g0453300	9	6059109	6060892
New	MQTL-9.2	EVM0013771	Os09g0461700	9	5587454	5588814
New	MQTL-9.2	EVM0013871	Os09g0491740	9	4066249	4071477
New	MQTL-9.2	EVM0014199	Os09g0481300	9	4572873	4576995
New	MQTL-9.2	EVM0014427	Os09g0482660	9	4494419	4501029
New	MQTL-9.2	EVM0015245	Os09g0508000	9	3340211	3341145
New	MQTL-9.2	EVM0016697	Os09g0482900	9	4399001	4400717
New	MQTL-9.2	EVM0017744	Os09g0528700	9	2312583	2314330
New	MQTL-9.2	EVM0018552	Os09g0518400	9	2798455	2803794
New	MQTL-9.2	EVM0019040	Os09g0509100	9	3281188	3283263
New	MQTL-9.2	EVM0019362	Os09g0530000	9	2251126	2253999
New	MQTL-9.2	EVM0019537	Os09g0462400	9	5568498	5571656
New	MQTL-9.2	EVM0020279	Os09g0485600	9	4312527	4317741
New	MQTL-9.2	EVM0021844	Os09g0472100	9	5008425	5013550
New	MQTL-9.2	EVM0022669	Os09g0499000	9	3727927	3729885
New	MQTL-9.2	EVM0023472	Os09g0469300	9	5203002	5204349
New	MQTL-9.2	EVM0023543	Os09g0517900	9	2828951	2835600
New	MQTL-9.2	EVM0023619	Os09g0526300	9	2427474	2433216
New	MQTL-9.2	EVM0024192	Os09g0512000	9	3112024	3114089
New	MQTL-9.2	EVM0024495	Os09g0494600	9	3871699	3873276
New	MQTL-9.2	EVM0024728	Os09g0460400	9	5629519	5630799
New	MQTL-9.2	EVM0025520	Os09g0524001	9	2530467	2532417
New	MQTL-9.2	EVM0026808	Os09g0472700	9	4988022	4989341
New	MQTL-9.2	EVM0027052	Os09g0526700	9	2402592	2405107
New	MQTL-9.2	EVM0027334	Os09g0481200	9	4576605	4577030
New	MQTL-9.2	EVM0027385	Os09g0459450	9	5687768	5688926
New	MQTL-9.2	EVM0027946	Os09g0511300	9	3156709	3157419
New	MQTL-9.2	EVM0030002	Os09g0452200	9	6097986	6101621
New	MQTL-9.2	EVM0032144	Os09g0504000	9	3544655	3546767
New	MQTL-9.2	EVM0032834	Os09g0482761	9	4445882	4446937
New	MQTL-9.2	EVM0033297	Os09g0467300	9	5296610	5299093
New	MQTL-9.2	EVM0033337	Os09g0518200	9	2808528	2810288
New	MQTL-9.2	EVM0034721	Os09g0453800	9	6031570	6036134
New	MQTL-9.2	EVM0035770	Os09g0506450	9	3434716	3438114
New	MQTL-9.2	EVM0037367	Os09g0466800	9	5314541	5315979
New	MQTL-9.2	EVM0037486	Os09g0458300	9	5724754	5727048
New	MQTL-9.2	EVM0038678	Os09g0472900	9	4979165	4980142
New	MQTL-9.2	EVM0039526	Os09g0484900	9	4340403	4343316
New	MQTL-9.2	EVM0040252	Os09g0518750	9	2782299	2783139
New	MQTL-9.2	EVM0041035	Os09g0458800	9	5714690	5715524
New	MQTL-9.2	EVM0041703	Os09g0468000	9	5263088	5270682
New	MQTL-9.2	EVM0041761	Os09g0491100	9	4143919	4146681
New	MQTL-9.2	EVM0044857	Os09g0469950	9	5162023	5165792
New	MQTL-9.2	EVM0044939	Os09g0527700	9	2362625	2364126
New	MQTL-9.2	EVM0045201	Os09g0491820	9	4027213	4029771
New	MQTL-9.3	EVM0001928	Os09g0508900	9	3299367	3303685
New	MQTL-9.3	EVM0003750	Os09g0517200	9	2864383	2869495
New	MQTL-9.3	EVM0004687	Os09g0524800	9	2504884	2507542
New	MQTL-9.3	EVM0009453	Os09g0520800	9	2671761	2673706
New	MQTL-9.3	EVM0011177	Os09g0505000	9	3512402	3513348
New	MQTL-9.3	EVM0015245	Os09g0508000	9	3340211	3341145
New	MQTL-9.3	EVM0018552	Os09g0518400	9	2798455	2803794
New	MQTL-9.3	EVM0019040	Os09g0509100	9	3281188	3283263
New	MQTL-9.3	EVM0022669	Os09g0499000	9	3727927	3729885
New	MQTL-9.3	EVM0023543	Os09g0517900	9	2828951	2835600
New	MQTL-9.3	EVM0024192	Os09g0512000	9	3112024	3114089
New	MQTL-9.3	EVM0025520	Os09g0524001	9	2530467	2532417
New	MQTL-9.3	EVM0027946	Os09g0511300	9	3156709	3157419
New	MQTL-9.3	EVM0032144	Os09g0504000	9	3544655	3546767
New	MQTL-9.3	EVM0033337	Os09g0518200	9	2808528	2810288
New	MQTL-9.3	EVM0035770	Os09g0506450	9	3434716	3438114
New	MQTL-9.3	EVM0040252	Os09g0518750	9	2782299	2783139
New	MQTL-9.4	EVM0003652	Os09g0564200	9	547334	550587
New	MQTL-9.4	EVM0005413	Os09g0551000	9	1190128	1193454
New	MQTL-9.4	EVM0006433	Os09g0554200	9	1033872	1034786
New	MQTL-9.4	EVM0008723	Os09g0565350	9	461158	466240
New	MQTL-9.4	EVM0012717	Os09g0559600	9	742106	749713
New	MQTL-9.4	EVM0015654	Os09g0564400	9	538483	540235
New	MQTL-9.4	EVM0027003	Os09g0553900	9	1042105	1045530
New	MQTL-9.4	EVM0030902	Os09g0554300	9	1022800	1027729
New	MQTL-9.4	EVM0032177	Os09g0549450	9	1251252	1256935
New	MQTL-9.4	EVM0032553	Os09g0560200	9	716287	717633
New	MQTL-9.4	EVM0032871	Os09g0551251	9	1170809	1188957
New	MQTL-10.1	EVM0000397	Os10g0478000	10	5432999	5434626
New	MQTL-10.1	EVM0024458	Os10g0481000	10	5192284	5193229
New	MQTL-10.1	EVM0027791	Os10g0481500	10	5148875	5152552
New	MQTL-10.2	EVM0001342	Os10g0509900	10	3538744	3539378
New	MQTL-10.2	EVM0002674	Os10g0520100	10	3056445	3057812
New	MQTL-10.2	EVM0003590	Os10g0505900	10	3751569	3753418
New	MQTL-10.2	EVM0004263	Os10g0516100	10	3259133	3261516
New	MQTL-10.2	EVM0007866	Os10g0516350	10	3242144	3247676
New	MQTL-10.2	EVM0008278	Os10g0513900	10	3317825	3319771
New	MQTL-10.2	EVM0009590	Os10g0512400	10	3411643	3417834
New	MQTL-10.2	EVM0010409	Os10g0521900	10	2975230	2977241
New	MQTL-10.2	EVM0011180	Os10g0503250	10	3889106	3891941
New	MQTL-10.2	EVM0012111	Os10g0516200	10	3255164	3257070
New	MQTL-10.2	EVM0012921	Os10g0509600	10	3554098	3554388
New	MQTL-10.2	EVM0015847	Os10g0504900	10	3803416	3803936
New	MQTL-10.2	EVM0022222	Os10g0523201	10	2874558	2877282
New	MQTL-10.2	EVM0031633	Os10g0513400	10	3331084	3333029
New	MQTL-10.2	EVM0034891	Os10g0509401	10	3568413	3569101
New	MQTL-10.2	EVM0040627	Os10g0521100	10	3020968	3022552
New	MQTL-10.2	EVM0045501	Os10g0510500	10	3505724	3506696
New	MQTL-10.3	EVM0005186	Os10g0542900	10	2028048	2030048
New	MQTL-10.3	EVM0005306	Os10g0552700	10	1532368	1532742
New	MQTL-10.3	EVM0005892	Os10g0545100	10	1929433	1933085
New	MQTL-10.3	EVM0006673	Os10g0554200	10	1464949	1469410
New	MQTL-10.3	EVM0009301	Os10g0546600	10	1861682	1866725
New	MQTL-10.3	EVM0013858	Os10g0552800	10	1528954	1529684
New	MQTL-10.3	EVM0015470	Os10g0551800	10	1567911	1568708
New	MQTL-10.3	EVM0016588	Os10g0548100	10	1789595	1790547
New	MQTL-10.3	EVM0022907	Os10g0552200	10	1555565	1556184
New	MQTL-10.3	EVM0024538	Os10g0548850	10	1753305	1755734
New	MQTL-10.3	EVM0025232	Os10g0551700	10	1570531	1571364
New	MQTL-10.3	EVM0025666	Os10g0552600	10	1535535	1536556
New	MQTL-10.3	EVM0033548	Os10g0548600	10	1768521	1769991
New	MQTL-10.3	EVM0034453	Os10g0547900	10	1796359	1799924
New	MQTL-10.3	EVM0035245	Os10g0546100	10	1895464	1896821
New	MQTL-10.3	EVM0037735	Os10g0552300	10	1551418	1552150
New	MQTL-10.3	EVM0038113	Os10g0550900	10	1614444	1617057
New	MQTL-10.3	EVM0042580	Os10g0552200	10	1558928	1559323
New	MQTL-11.1	EVM0002039	Os11g0141333	11	1807025	1808049
New	MQTL-11.1	EVM0002947	Os11g0135000	11	1516027	1520899
New	MQTL-11.1	EVM0004979	Os11g0156700	11	2578648	2579814
New	MQTL-11.1	EVM0006763	Os11g0160400	11	2822116	2823071
New	MQTL-11.1	EVM0007882	Os11g0155600	11	2496407	2504855
New	MQTL-11.1	EVM0009228	Os11g0133001	11	1396076	1401516
New	MQTL-11.1	EVM0011977	Os11g0134900	11	1507863	1514359
New	MQTL-11.1	EVM0012488	Os11g0139400	11	1708462	1709840
New	MQTL-11.1	EVM0013748	Os11g0151700	11	2313823	2317058
New	MQTL-11.1	EVM0014500	Os11g0156401	11	2553516	2557183
New	MQTL-11.1	EVM0014892	Os11g0141400	11	1820830	1821808
New	MQTL-11.1	EVM0015622	Os11g0147800	11	2094337	2097394
New	MQTL-11.1	EVM0017536	Os11g0153100	11	2372136	2372408
New	MQTL-11.1	EVM0019564	Os11g0138600	11	1688313	1689859
New	MQTL-11.1	EVM0028800	Os11g0156000	11	2521648	2524206
New	MQTL-11.1	EVM0031028	Os11g0136300	11	30694847	30699877
New	MQTL-11.1	EVM0032912	Os11g0158600	11	2727087	2734058
New	MQTL-11.1	EVM0037195	Os11g0139700	11	1722166	1727405
New	MQTL-11.1	EVM0041904	Os11g0142500	11	1879034	1884454
New	MQTL-11.1	EVM0042349	Os11g0153000	11	2367048	2367760
New	MQTL-11.1	EVM0044366	Os11g0160550	11	2839223	2840836
New	MQTL-11.1	EVM0044372	Os11g0146300	11	1987364	1990695
New	MQTL-11.1	Oyza_sagiva_newGene_3927	Os11g0147150	11	2037951	2041248
New	MQTL-11.1	Oyza_sagiva_newGene_3937	Os11g0151200	11	2268760	2271994
New	MQTL-11.2	EVM0000901	Os11g0249700	11	8215855	8217580
New	MQTL-11.2	EVM0002927	Os11g0257700	11	8631733	8633881
New	MQTL-11.2	EVM0015060	Os11g0275000	11	10257735	10261570
New	MQTL-11.2	EVM0015073	Os11g0253100	11	8296825	8301330
New	MQTL-11.2	EVM0018540	Os11g0270000	11	10005841	10006921
New	MQTL-11.2	EVM0018691	Os11g0274700	11	10219379	10228195
New	MQTL-11.2	EVM0019345	Os11g0259700	11	8758537	8760876
New	MQTL-11.2	EVM0022373	Os11g0260100	11	8786852	8788721
New	MQTL-11.2	EVM0026978	Os11g0267000	11	9412949	9420054
New	MQTL-11.2	EVM0031568	Os11g0257800	11	8652312	8655565
New	MQTL-11.2	EVM0042507	Os11g0256900	11	8575177	8577687
New	MQTL-11.3	EVM0008756	Os11g0678200	11	29122799	29124365
New	MQTL-11.3	EVM0009237	Os11g0673200	11	28873284	28880214
New	MQTL-11.3	EVM0010225	Os11g0677425	11	28677110	28678546
New	MQTL-11.3	EVM0016857	Os11g0702100	11	30411632	30412801
New	MQTL-11.3	EVM0018467	Os11g0700900	11	30362440	30364023
New	MQTL-11.3	EVM0021846	Os11g0679700	11	29183094	29186482
New	MQTL-11.3	EVM0022855	Os11g0678000	11	29113819	29121324
New	MQTL-11.3	EVM0025272	Os11g0671000	11	28786002	28787669
New	MQTL-11.3	EVM0027990	Os11g0683500	11	29349745	29356291
New	MQTL-11.3	EVM0029699	Os11g0667700	11	28693414	28699941
New	MQTL-11.3	EVM0030305	Os11g0676500	11	28987822	28990922
New	MQTL-11.3	EVM0031296	Os11g0691100	11	29889266	29895033
New	MQTL-11.3	EVM0034393	Os11g0701500	11	30378922	30379954
New	MQTL-11.3	EVM0037428	Os11g0676500	11	29033644	29036742
New	MQTL-11.3	EVM0038341	Os11g0664400	11	28521278	28522666
New	MQTL-11.3	EVM0041440	Os11g0701600	11	30394840	30395684
New	MQTL-11.3	EVM0043007	Os11g0703100	11	30435387	30436220
New	MQTL-11.3	EVM0045342	Os11g0665600	11	28579341	28580775
New	MQTL-12.1	EVM0003377	Os12g0257600	12	8321791	8325518
New	MQTL-12.1	EVM0004441	Os12g0227500	12	6464992	6469791
New	MQTL-12.1	EVM0007297	Os12g0283400	12	10177310	10177996
New	MQTL-12.1	EVM0007596	Os12g0263000	12	8714415	8720907
New	MQTL-12.1	EVM0008181	Os12g0283300	12	10169076	10170013
New	MQTL-12.1	EVM0008686	Os12g0257000	12	8281820	8286857
New	MQTL-12.1	EVM0011227	Os12g0263800	12	8768699	8769073
New	MQTL-12.1	EVM0012142	Os12g0267200	12	8980142	8992231
New	MQTL-12.1	EVM0016343	Os12g0274700	12	9525195	9526482
New	MQTL-12.1	EVM0017848	Os12g0292400	12	10765822	10768093
New	MQTL-12.1	EVM0020905	Os12g0454600	12	14284555	14286537
New	MQTL-12.1	EVM0020924	Os12g0458900	12	14525998	14533719
New	MQTL-12.1	EVM0021474	Os12g0271700	12	9360043	9367445
New	MQTL-12.1	EVM0022190	Os12g0260500	12	8583774	8585224
New	MQTL-12.1	EVM0022477	Os12g0479100	12	15854882	15873260
New	MQTL-12.1	EVM0022601	Os12g0411700	12	11515777	11533661
New	MQTL-12.1	EVM0022862	Os12g0443000	12	13784636	13786266
New	MQTL-12.1	EVM0023301	Os12g0231000	12	6607365	6612585
New	MQTL-12.1	EVM0024379	Os12g0433700	12	12972233	12975343
New	MQTL-12.1	EVM0025087	Os12g0428000	12	12574554	12576494
New	MQTL-12.1	EVM0028348	Os12g0283100	12	10156737	10162659
New	MQTL-12.1	EVM0029282	Os12g0431700	12	12831788	12833919
New	MQTL-12.1	EVM0030810	Os12g0257900	12	8333969	8335309
New	MQTL-12.1	EVM0031615	Os12g0258700	12	8420437	8423628
New	MQTL-12.1	EVM0031659	Os12g0417100	12	11839627	11839970
New	MQTL-12.1	EVM0032123	Os12g0443500	12	13805315	13808966
New	MQTL-12.1	EVM0033672	Os12g0410050	12	11396376	11397441
New	MQTL-12.1	EVM0034002	Os12g0420300	12	12058274	12061726
New	MQTL-12.1	EVM0034308	Os12g0420200	12	12050965	12053749
New	MQTL-12.1	EVM0034563	Os12g0291100	12	10707745	10723725
New	MQTL-12.1	EVM0035465	Os12g0478200	12	15797010	15798972
New	MQTL-12.1	EVM0038026	Os12g0459100	12	14543228	14546746
New	MQTL-12.1	EVM0038050	Os12g0453500	12	15523003	15523929
New	MQTL-12.1	EVM0040139	Os12g0282000	12	10096704	10098273
New	MQTL-12.1	EVM0040858	Os12g0437800	12	13329511	13330231
New	MQTL-12.1	EVM0040913	Os12g0227400	12	6454272	6458529
New	MQTL-12.1	EVM0042721	Os12g0270900	12	9266570	9268468
New	MQTL-12.1	EVM0043310	Os12g0420400	12	12062507	12064689
New	MQTL-12.1	EVM0043449	Os12g0455000	12	14314443	14315006
New	MQTL-12.1	EVM0043715	Os12g0470000	12	15316968	15319292
New	MQTL-12.1	EVM0044647	Os12g0431100	12	12797087	12799582
New	MQTL-12.1	EVM0044944	Os12g0266200	12	8915147	8929986
New	MQTL-12.1	EVM0045176	Os12g0246700	12	7605104	7609289
New	MQTL-12.1	Oyza_sagiva_newGene_8674	Os12g0289833	12	10621262	10624362
New	MQTL-12.1	EVM0008049	Os12g0451300	Congig330	111134	112319
New	MQTL-12.1	EVM0028008	Os12g0471100	Congig236	8972	10801
New	MQTL-12.1	EVM0034660	Os12g0423484	Congig203	5265	6026
New	MQTL-12.1	EVM0040908	Os12g0423484	Congig263	38260	38937
New	MQTL-12.3	EVM0005241	Os12g0570300	12	21168011	21168686
New	MQTL-12.3	EVM0008382	Os12g0571600	12	21213461	21214063
New	MQTL-12.3	EVM0008450	Os12g0555200	12	20235221	20237104
New	MQTL-12.3	EVM0011781	Os12g0548501	12	19841484	19841765
New	MQTL-12.3	EVM0018239	Os12g0548700	12	19846048	19846834
New	MQTL-12.3	EVM0021354	Os12g0567500	12	21020656	21027580
New	MQTL-12.3	EVM0022141	Os12g0571300	12	21203350	21204401
New	MQTL-12.3	EVM0024798	Os12g0555500	12	20243681	20244861
New	MQTL-12.3	EVM0025188	Os12g0570700	12	21184533	21185193
New	MQTL-12.3	EVM0025748	Os12g0570400	12	21174910	21175870
New	MQTL-12.3	EVM0025795	Os12g0548401	12	19836902	19837135
New	MQTL-12.3	EVM0027751	Os12g0551900	12	20035536	20041700
New	MQTL-12.3	EVM0028038	Os12g0562100	12	20712782	20717765
New	MQTL-12.3	EVM0028739	Os12g0559200	12	20499311	20504451
New	MQTL-12.3	EVM0036728	Os12g0568500	12	21073149	21074114
New	MQTL-12.3	EVM0038105	Os12g0566600	12	20976345	20976912
New	MQTL-12.3	EVM0038896	Os12g0568100	12	21059122	21062632
New	MQTL-12.3	EVM0039010	Os12g0554800	12	20216402	20220103
New	MQTL-12.3	EVM0041388	Os12g0554100	12	20154958	20157955
New	MQTL-12.3	EVM0044079	Os12g0568200	12	21065896	21066812
New	MQTL-12.3	EVM0045408	Os12g0571000	12	21195703	21196337
New	MQTL-12.3	EVM0045461	Os12g0556300	12	20279527	20283856
Published	MQTL-1.3	EVM0032974	Os01g0571300	1	21322383	21325171
Published	MQTL-2.4	EVM0024706	Os02g0662000	2	27197267	27198095
Published	MQTL-2.4	EVM0037638	Os02g0656600	2	26916844	26918256
Published	MQTL-3.1	EVM0009058	Os03g0170900	3	3857790	3864232
Published	MQTL-3.2	EVM0041179	Os03g0322900	3	11857243	11858622
Published	MQTL-4.3	EVM0003311	Os04g0543900	4	8174606	8179273
Published	MQTL-4.3	EVM0011272	Os04g0540900	4	8353159	8354846
Published	MQTL-4.3	EVM0018891	Os04g0517100	4	9573035	9574878
Published	MQTL-4.3	EVM0027299	Os04g0546800	4	8039803	8041646
Published	MQTL-4.3	EVM0032263	Os04g0549700	4	7894384	7895522
Published	MQTL-5.4	EVM0019113	Os05g0475400	5	22993067	22996570
Published	MQTL-6.4	EVM0002895	Os06g0701700	6	1613715	1634904
Published	MQTL-6.4	Oyza_sagiva_newGene_5725	Os06g0701700	6	1671898	1674676
Published	MQTL-8.2	EVM0042736	Os08g0445700	8	21171347	21175180
Published	MQTL-8.2	EVM0045064	Os08g0374701	8	16974930	16976500
Published	MQTL-12.3	EVM0037996	Os12g0555000	12	20224322	20225555

## Sheet: Table S7
Table S7. 70 known salt stress-related genes in G2 and G3
Os05g0542500
Os01g0571300
Os11g0523700
Os01g0797600
Os04g0401700
Os09g0543400
Os05g0525900
Os03g0170900
Os02g0662000
Os06g0701700
Os01g0839100
Os04g0546800
Os06g0561000
Os12g0106200
Os04g0607600
Os11g0126900
Os04g0543900
Os05g0475400
Os01g0884300
Os02g0618400
Os04g0474800
Os01g0752500
Os03g0576200
Os02g0669100
Os02g0802500
Os04g0607500
Os11g0113700
Os01g0292700
Os03g0319300
Os01g0200600
Os11g0184900
Os03g0322900
Os01g0141000
Os03g0281900
Os01g0955100
Os09g0545300
Os04g0540900
Os01g0699100
Os03g0820300
Os01g0868000
Os07g0103500
Os03g0315400
Os01g0348900
Os02g0215900
Os12g0555000
Os02g0649300
Os10g0409400
Os04g0659100
Os11g0454300
Os02g0656600
Os01g0975300
Os04g0517100
Os08g0541400
Os01g0505600
Os05g0381400
Os03g0815100
Os08g0374701
Os01g0827300
Os12g0583700
Os04g0659300
Os07g0154100
Os12g0603800
Os10g0456800
Os04g0605500
Os07g0559700
Os04g0110100
Os01g0615100
Os01g0648000
Os08g0445700
Os04g0549700

## Sheet: Table S8
	C2RCK0d-1_C2RCK0d-2_C2RCK0d-3_vs_C2RSa3d-1_C2RSa3d-2_C2RSa3d-3_DESeq2_log2FC	C2RCK0d-1_C2RCK0d-2_C2RCK0d-3_vs_C2RSa7d-1_C2RSa7d-2_C2RSa7d-3_DESeq2_log2FC	RPYCK0d-1_RPYCK0d-2_RPYCK0d-3_vs_RPYSa3d-1_RPYSa3d-2_RPYSa3d-3_DESeq2_log2FC	RPYCK0d-1_RPYCK0d-2_RPYCK0d-3_vs_RPYSa7d-1_RPYSa7d-2_RPYSa7d-3_DESeq2_log2FC
EVM0025666	-2.05493	-2.03777	-0.92674	-1.17794
EVM0024798	4.40239	7.39136	1.64819	2.48302
EVM0041760	1.75986	2.13607	0.540235	1.35207
EVM0010742	0.0766604	2.78678	-0.0518909	1.4941
EVM0022292	0.941787	2.51165	0.291784	2.00302
